# Supplementary material
Source: PubMed Central journal article supplement (PMC10209823)
Supplement: jamapsychiatry-e231012-s001.pdf [file jamapsychiatry-e231012-s001.pdf]

## Supplementary Online Content

McLachlan E, Ocal D, Burgess N, Reeves S, Howard R; Alzheimer's Disease Neuroimaging Initiative. Association between false memories and delusions in Alzheimer disease. *JAMA Psychiatry*. Published online May 24, 2023. doi:10.1001/jamapsychiatry.2023.1012

**eTable 1.** Alzheimer's Disease Neuroimaging Initiative (ADNI) Inclusion and Exclusion Criteria

**eTable 2.** Breakdown and Classification of Psychosis Symptoms at Baseline (n = 32)

**eFigure 1.** Participant Selection Flow Chart

**eTable 3.** Comparison Between Remaining Sample and Participant Excluded Due to Poor Scan Quality

**eTable 4.** Binary Logistic Regression Modeling to Predict Presence of Delusions at Baseline

**eTable 5.** Region of Interest Analysis Model Diagnostics

**eFigure 2.** Voxel-Based Morphometry (VBM) Design Orthogonality Matrices

**eTable 6.** Comparison of Volume in Identified Regions of Interest Between Those With Delusions at Baseline and the Control Group

This supplementary material has been provided by the authors to give readers additional information about their work.

**eTable 1.** Alzheimer’s Disease Neuroimaging Initiative (ADNI) Inclusion and Exclusion Criteria

|                                                                                                                                                                                                                                                                                                                                                                                                         |
|---------------------------------------------------------------------------------------------------------------------------------------------------------------------------------------------------------------------------------------------------------------------------------------------------------------------------------------------------------------------------------------------------------|
| <i>General Criteria</i>                                                                                                                                                                                                                                                                                                                                                                                 |
| Hachinski less than or equal to 4                                                                                                                                                                                                                                                                                                                                                                       |
| Age between 55-90                                                                                                                                                                                                                                                                                                                                                                                       |
| Stability of Permitted Medications for 4 weeks (see <a href="https://adni.loni.usc.edu/methods/documents/">https://adni.loni.usc.edu/methods/documents/</a> for permitted medication list)                                                                                                                                                                                                              |
| Geriatric Depression Scale less than 6                                                                                                                                                                                                                                                                                                                                                                  |
| Study partner with 10+ hr/wk contact (can be in person and telephone), accompanies to visits                                                                                                                                                                                                                                                                                                            |
| Visual and auditory acuity adequate for neuropsychological testing                                                                                                                                                                                                                                                                                                                                      |
| Good general health with no diseases precluding enrollment                                                                                                                                                                                                                                                                                                                                              |
| Women must be sterile or two years past childbearing potential                                                                                                                                                                                                                                                                                                                                          |
| Willing and able to complete a 3 year imaging study (2 years for AD subjects)                                                                                                                                                                                                                                                                                                                           |
| 6 grades education or work history                                                                                                                                                                                                                                                                                                                                                                      |
| Must speak English/Spanish fluently                                                                                                                                                                                                                                                                                                                                                                     |
| Commitment to Neuroimaging and no medical contraindications to MRI                                                                                                                                                                                                                                                                                                                                      |
| Agrees to DNA for ApoE testing and banking                                                                                                                                                                                                                                                                                                                                                              |
| Agrees to Blood and Urine for Biomarkers                                                                                                                                                                                                                                                                                                                                                                |
| Not enrolled in other trials or studies                                                                                                                                                                                                                                                                                                                                                                 |
| <i>Group specific criteria: Cognitively normal</i>                                                                                                                                                                                                                                                                                                                                                      |
| No Memory Complaints aside from those common to other normal subjects of that age range.                                                                                                                                                                                                                                                                                                                |
| Normal memory function documented by scoring at specific cutoffs on the Logical Memory II subscale (delayed Paragraph Recall) from the Wechsler Memory Scaled - Revised (the maximum score is 25):<br>a) greater than or equal to 9 for 16 or more years of education<br>b) greater than or equal to 5 for 8-15 years of education<br>c) greater than or equal to 3 for 0-7 years of education.         |
| Mini-Mental State Exam score between 24 and 30 (inclusive) (Exceptions may be made for subjects with less than 8 years of education at the discretion of the project director).                                                                                                                                                                                                                         |
| Clinical Dementia Rating = 0. Memory Box score must be 0.                                                                                                                                                                                                                                                                                                                                               |
| Cognitively normal, based on an absence of significant impairment in cognitive functions or activities of daily living.                                                                                                                                                                                                                                                                                 |
| <i>Group specific criteria: Mild Cognitive Impairment</i>                                                                                                                                                                                                                                                                                                                                               |
| Memory complaint by subject or study partner that is verified by a study partner.                                                                                                                                                                                                                                                                                                                       |
| Abnormal memory function documented by scoring below the education adjusted cutoff on the Logical Memory II subscale (Delayed Paragraph Recall) from the Wechsler Memory Scale – Revised (the maximum score is 25):<br>a) less than or equal to 8 for 16 or more years of education<br>b) less than or equal to 4 for 8-15 years of education<br>c) less than or equal to 2 for 0-7 years of education. |
| Mini-Mental State Exam score between 24 and 30 (inclusive) (Exceptions may be made for subjects with less than 8 years of education at the discretion of the project director).                                                                                                                                                                                                                         |
| Clinical Dementia Rating = 0.5. Memory Box score must be at least 0.5.                                                                                                                                                                                                                                                                                                                                  |
| General cognition and functional performance sufficiently preserved such that a diagnosis of Alzheimer disease cannot be made by the site physician at the time of the screening visit.                                                                                                                                                                                                                 |

*Group specific criteria: Alzheimer disease*

Memory complaint by subject or study partner that is verified by a study partner.

Abnormal memory function documented by scoring below the education adjusted cutoff on the Logical Memory II subscale (Delayed Paragraph Recall) from the Wechsler Memory Scale – Revised (the maximum score is 25):

- a) less than or equal to 8 for 16 or more years of education
- b) less than or equal to 4 for 8-15 years of education
- c) less than or equal to 2 for 0-7 years of education.

MMSE between 20 and 26 (inclusive) (Exceptions may be made for subjects with less than 8 years of education at the discretion of the protocol PI).

Clinical Dementia Rating = 0.5, 1.0

NINCDS/ADRDA criteria for probable AD.

**eTable 2.** Breakdown and Classification of Psychosis Symptoms at Baseline (n = 32)

|                                                                                                                                                                                                                                       | Content                                                 | N (%)     |
|---------------------------------------------------------------------------------------------------------------------------------------------------------------------------------------------------------------------------------------|---------------------------------------------------------|-----------|
| <i>Persecutory</i>                                                                                                                                                                                                                    |                                                         |           |
| Delusions                                                                                                                                                                                                                             | In danger/others are planning to hurt him/her           | 5 (15.6)  |
|                                                                                                                                                                                                                                       | Others are stealing from him/her                        | 12 (37.5) |
|                                                                                                                                                                                                                                       | Spouse is having an affair                              | 1 (3.1)   |
|                                                                                                                                                                                                                                       | Family members plan to abandon him/her                  | 3 (9.4)   |
| <i>Misidentification</i>                                                                                                                                                                                                              |                                                         |           |
| Delusions                                                                                                                                                                                                                             | Unwelcome guests are staying in his/her house           | 4 (12.5)  |
|                                                                                                                                                                                                                                       | His/her spouse or others are not who they claim to be   | 3 (9.4)   |
|                                                                                                                                                                                                                                       | His/her house is not his/her own                        | 2 (6.3)   |
|                                                                                                                                                                                                                                       | Television/magazine figures are present in his/her home | 1 (3.1)   |
| Hallucinations                                                                                                                                                                                                                        | He/she can hear voices                                  | 5 (15.6)  |
|                                                                                                                                                                                                                                       | Talks to people who are not there                       | 3 (9.4)   |
|                                                                                                                                                                                                                                       | Seeing things not seen by others                        | 7 (21.9)  |
| <i>Other</i>                                                                                                                                                                                                                          |                                                         |           |
| Delusions                                                                                                                                                                                                                             | Any other unusual beliefs                               | 11 (34.4) |
| Hallucinations                                                                                                                                                                                                                        | Smells odours not smelled by others                     | -         |
|                                                                                                                                                                                                                                       | Feels things on his/her skin                            | 3 (9.4)   |
|                                                                                                                                                                                                                                       | Tastes without known cause                              | 1 (3.1)   |
|                                                                                                                                                                                                                                       | Any other unusual sensory experiences                   | 4 (12.5)  |
| Notes:<br>In total seven participants experienced persecutory symptoms alone, nine misidentification symptoms alone, eight had mixed persecutory and misidentification symptoms and the remaining eight had other psychosis symptoms. |                                                         |           |

**eFigure 1. Participant Selection Flow Chart**

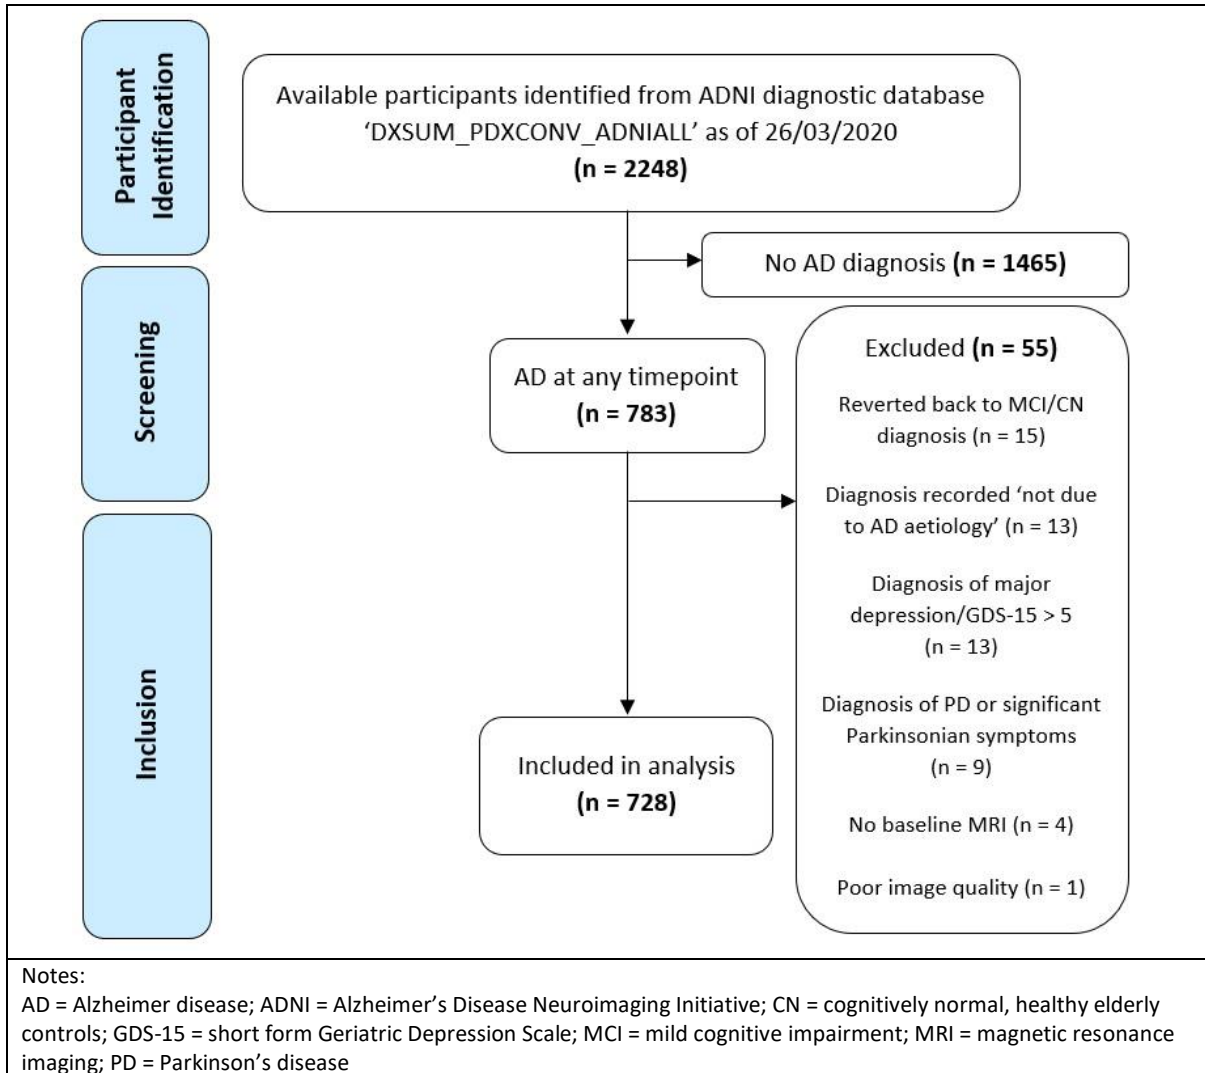

**eTable 3.** Comparison Between Remaining Sample and Participant Excluded Due to Poor Scan Quality

|                                                                                                                                                                                                                                                                                                                                                                                                                                             | Remaining sample<br>(n = 728) <sup>†</sup> | Excluded participant<br>(n = 1) |
|---------------------------------------------------------------------------------------------------------------------------------------------------------------------------------------------------------------------------------------------------------------------------------------------------------------------------------------------------------------------------------------------------------------------------------------------|--------------------------------------------|---------------------------------|
| Age, mean (SD), years                                                                                                                                                                                                                                                                                                                                                                                                                       | 74.8 (7.4)                                 | 82                              |
| No. (%) female                                                                                                                                                                                                                                                                                                                                                                                                                              | 317 (43.5)                                 | 1 (100)                         |
| No. (%) right handed                                                                                                                                                                                                                                                                                                                                                                                                                        | 673 (92.4)                                 | 1 (100)                         |
| Education, mean (SD), years                                                                                                                                                                                                                                                                                                                                                                                                                 | 15.5 (2.9)                                 | 14                              |
| No. (%) delusions at baseline                                                                                                                                                                                                                                                                                                                                                                                                               | 42 (5.8)                                   | 0 (0)                           |
| No. (%) hallucinations at baseline                                                                                                                                                                                                                                                                                                                                                                                                          | 24 (3.3)                                   | 0 (0)                           |
| <i>Race</i>                                                                                                                                                                                                                                                                                                                                                                                                                                 |                                            |                                 |
| No (%) Asian                                                                                                                                                                                                                                                                                                                                                                                                                                | 16 (2.2)                                   | -                               |
| No (%) Black                                                                                                                                                                                                                                                                                                                                                                                                                                | 25 (3.4)                                   | -                               |
| No. (%) White                                                                                                                                                                                                                                                                                                                                                                                                                               | 681 (93.5)                                 | 1 (100)                         |
| No. (%) Multiple races <sup>‡</sup>                                                                                                                                                                                                                                                                                                                                                                                                         | 6 (0.8)                                    | -                               |
| <i>Diagnosis</i>                                                                                                                                                                                                                                                                                                                                                                                                                            |                                            |                                 |
| No. (%) cognitively normal                                                                                                                                                                                                                                                                                                                                                                                                                  | 27 (3.7)                                   | -                               |
| No. (%) amnesic MCI                                                                                                                                                                                                                                                                                                                                                                                                                         | 315 (43.3)                                 | 1 (100)                         |
| No. (%) Alzheimer disease                                                                                                                                                                                                                                                                                                                                                                                                                   | 386 (53.0)                                 | -                               |
| <i>Medication</i>                                                                                                                                                                                                                                                                                                                                                                                                                           |                                            |                                 |
| No. (%) ChEI/Memantine                                                                                                                                                                                                                                                                                                                                                                                                                      | 523 (71.8)                                 | 0 (0)                           |
| No. (%) antidepressant                                                                                                                                                                                                                                                                                                                                                                                                                      | 251 (34.5)                                 | 1 (100)                         |
| No. (%) antipsychotic                                                                                                                                                                                                                                                                                                                                                                                                                       | 10 (1.4)                                   | 0 (0)                           |
| <i>Screening Assessments</i>                                                                                                                                                                                                                                                                                                                                                                                                                |                                            |                                 |
| NPI-Q, median (IQR), score                                                                                                                                                                                                                                                                                                                                                                                                                  | 2 (0 – 4)                                  | 1                               |
| MMSE, mean (SD), score                                                                                                                                                                                                                                                                                                                                                                                                                      | 25.1 (2.9)                                 | 30                              |
| GDS-15, median (IQR), score                                                                                                                                                                                                                                                                                                                                                                                                                 | 1 (1 – 2)                                  | 4                               |
| Category fluency, mean (SD), score                                                                                                                                                                                                                                                                                                                                                                                                          | 14.0 (5.2)                                 | 12                              |
| Notes:<br>MCI = mild cognitive impairment; ChEI = cholinesterase inhibitor; GDS-15 = short form Geriatric Depression Scale; MMSE = Mini Mental State Examination; NPI-Q = Neuropsychiatric Inventory Questionnaire.<br><sup>†</sup> Whole sample n = 727 for Medication and Category fluency.<br><sup>‡</sup> Indicates that participant self-reported as 'more than one race' when demographic details were collected by ADNI researchers. |                                            |                                 |

**eTable 4.** Binary Logistic Regression Modeling to Predict Presence of Delusions at Baseline

**4a.** Binary logistic regression modeling to predict presence of delusions at baseline, with false recognition on ADAS-Cog 13 as false memory measure (n = 589)

| Covariates                             | Odds ratio (95% CI) | P Value     |
|----------------------------------------|---------------------|-------------|
| Total false recognition on ADAS-Cog 13 | 1.060 (.950, 1.183) | .298        |
| Age                                    | 1.024 (.979, 1.070) | .309        |
| Gender                                 | .888 (.450, 1.753)  | .733        |
| Years of education                     | 1.060 (.937, 1.199) | .353        |
| ChEI                                   | .983 (.427, 2.264)  | .967        |
| MMSE                                   | .864 (.756, .987)   | <b>.032</b> |
| Category fluency                       | .950 (.884, 1.021)  | .161        |

**4b.** Binary logistic regression modeling to predict presence of delusions at baseline, with false recognition on RAVLT as false memory measure (n = 588)

| Covariates                       | Odds ratio (95% CI) | P Value     |
|----------------------------------|---------------------|-------------|
| Total false recognition on RAVLT | 1.048 (.930, 1.181) | .442        |
| Age                              | 1.022 (.977, 1.069) | .339        |
| Gender                           | .865 (.440, 1.700)  | .673        |
| Years of education               | 1.058 (.936, 1.196) | .365        |
| ChEI                             | .971 (.421, 2.235)  | .944        |
| MMSE                             | .859 (.752, .981)   | <b>.025</b> |
| Category fluency                 | .949 (.883, 1.019)  | .149        |

Notes:  
 ADAS-Cog 13 = Alzheimer’s Disease Assessment Scale–Cognitive Subscale, 13 item; ChEI = cholinesterase inhibitor prescription; MMSE = Mini Mental State Examination; RAVLT = Rey’s Auditory Verbal Learning Test. Category fluency for animals only.

**eTable 5. Region of Interest Analysis Model Diagnostics**

| Region of Interest                    | ADAS-Cog 13 False Recognition Models <sup>†</sup> |                |                             |                                          | RAVLT False Recognition Models <sup>†</sup>      |                |                             |                                          |
|---------------------------------------|---------------------------------------------------|----------------|-----------------------------|------------------------------------------|--------------------------------------------------|----------------|-----------------------------|------------------------------------------|
|                                       | Model likelihood ratio, $X^2$ ( $ps < .001$ )     | VIF, mean (SD) | Pearson residual, mean (SD) | Cook's distance <sup>‡</sup> , mean (SD) | Model likelihood ratio, $X^2$ ( $ps \leq .002$ ) | VIF, mean (SD) | Pearson residual, mean (SD) | Cook's distance <sup>‡</sup> , mean (SD) |
| L Hippocampus                         | 105.0                                             | 1.2 (0.1)      | 0.0 (1.0)                   | 1.4 (2.7)                                | 32.0                                             | 1.2 (0.2)      | 0.0 (1.0)                   | 1.4 (3.4)                                |
| R Hippocampus                         | 88.7                                              | 1.2 (0.1)      | 0.0 (1.0)                   | 1.4 (2.7)                                | 26.1                                             | 1.2 (0.1)      | 0.0 (1.0)                   | 1.4 (3.5)                                |
| L Entorhinal Cortex                   | 83.0                                              | 1.2 (0.1)      | 0.0 (1.0)                   | 1.4 (2.7)                                | 29.3                                             | 1.2 (0.1)      | 0.0 (1.0)                   | 1.4 (3.6)                                |
| R Entorhinal Cortex                   | 78.0                                              | 1.2 (0.1)      | 0.0 (1.0)                   | 1.4 (2.8)                                | 28.6                                             | 1.2 (0.1)      | 0.0 (1.0)                   | 1.4 (3.4)                                |
| L Anterior Cingulate Gyrus            | 69.9                                              | 1.2 (0.1)      | 0.0 (1.0)                   | 1.4 (2.6)                                | 27.0                                             | 1.2 (0.1)      | 0.0 (1.0)                   | 1.5 (4.1)                                |
| R Anterior Cingulate Gyrus            | 71.6                                              | 1.2 (0.1)      | 0.0 (1.0)                   | 1.4 (2.6)                                | 28.0                                             | 1.2 (0.1)      | 0.0 (1.0)                   | 1.5 (3.9)                                |
| L Superior Parietal Lobule            | 68.0                                              | 1.2 (0.1)      | 0.0 (1.0)                   | 1.4 (2.5)                                | 25.6                                             | 1.2 (0.1)      | 0.0 (1.0)                   | 1.4 (3.6)                                |
| R Superior Parietal Lobule            | 66.5                                              | 1.2 (0.1)      | 0.0 (1.0)                   | 1.3 (2.4)                                | 24.6                                             | 1.2 (0.1)      | 0.0 (1.0)                   | 1.4 (3.7)                                |
| <i>Ventral Visual Stream</i>          |                                                   |                |                             |                                          |                                                  |                |                             |                                          |
| L Parahippocampal Gyrus               | 86.3                                              | 1.3 (0.2)      | 0.0 (1.0)                   | 1.4 (2.7)                                | 30.4                                             | 1.3 (0.2)      | 0.0 (1.0)                   | 1.4 (3.5)                                |
| R Parahippocampal Gyrus               | 72.2                                              | 1.3 (0.2)      | 0.0 (1.0)                   | 1.4 (2.7)                                | 29.4                                             | 1.3 (0.2)      | 0.0 (1.0)                   | 1.4 (3.5)                                |
| L Fusiform Gyrus                      | 79.1                                              | 1.3 (0.2)      | 0.0 (1.0)                   | 1.4 (2.6)                                | 25.4                                             | 1.3 (0.2)      | 0.0 (1.0)                   | 1.4 (3.6)                                |
| R Fusiform Gyrus                      | 72.4                                              | 1.2 (0.1)      | 0.0 (1.0)                   | 1.4 (2.7)                                | 27.5                                             | 1.2 (0.1)      | 0.0 (1.0)                   | 1.4 (3.4)                                |
| L Lingual Gyrus                       | 66.2                                              | 1.2 (0.1)      | 0.0 (1.0)                   | 1.4 (2.5)                                | 24.7                                             | 1.2 (0.1)      | 0.0 (1.0)                   | 1.4 (3.7)                                |
| R Lingual Gyrus                       | 65.1                                              | 1.2 (0.1)      | 0.0 (1.0)                   | 1.4 (2.5)                                | 25.2                                             | 1.2 (0.1)      | 0.0 (1.0)                   | 1.4 (3.4)                                |
| <i>Dorsolateral Prefrontal Cortex</i> |                                                   |                |                             |                                          |                                                  |                |                             |                                          |
| L Middle Frontal Gyrus                | 71.4                                              | 1.2 (0.1)      | 0.0 (1.0)                   | 1.4 (2.5)                                | 25.8                                             | 1.2 (0.1)      | 0.0 (1.0)                   | 1.5 (3.8)                                |
| R Middle Frontal Gyrus                | 72.7                                              | 1.2 (0.1)      | 0.0 (1.0)                   | 1.4 (2.6)                                | 26.8                                             | 1.2 (0.1)      | 0.0 (1.0)                   | 1.4 (3.7)                                |



|                                                                                                                                                                                                                                                                                                                                                                                                                                                                                                                             |      |           |           |           |      |           |           |           |
|-----------------------------------------------------------------------------------------------------------------------------------------------------------------------------------------------------------------------------------------------------------------------------------------------------------------------------------------------------------------------------------------------------------------------------------------------------------------------------------------------------------------------------|------|-----------|-----------|-----------|------|-----------|-----------|-----------|
| L Superior Frontal Gyrus                                                                                                                                                                                                                                                                                                                                                                                                                                                                                                    | 66.8 | 1.2 (0.1) | 0.0 (1.0) | 1.4 (2.5) | 31.5 | 1.2 (0.1) | 0.0 (1.0) | 1.5 (4.0) |
| R Superior Frontal Gyrus                                                                                                                                                                                                                                                                                                                                                                                                                                                                                                    | 71.2 | 1.2 (0.1) | 0.0 (1.0) | 1.4 (2.6) | 28.1 | 1.2 (0.1) | 0.0 (1.0) | 1.5 (3.8) |
| <i>Ventrolateral Prefrontal cortex</i>                                                                                                                                                                                                                                                                                                                                                                                                                                                                                      |      |           |           |           |      |           |           |           |
| L Inferior Frontal Gyrus                                                                                                                                                                                                                                                                                                                                                                                                                                                                                                    | 73.3 | 1.2 (0.1) | 0.0 (1.0) | 1.4 (2.6) | 27.9 | 1.2 (0.1) | 0.0 (1.0) | 1.4 (3.6) |
| R Inferior Frontal Gyrus                                                                                                                                                                                                                                                                                                                                                                                                                                                                                                    | 67.6 | 1.2 (0.1) | 0.0 (1.0) | 1.4 (2.6) | 26.1 | 1.2 (0.1) | 0.0 (1.0) | 1.4 (3.5) |
| L Inferior Frontal Orbital Gyrus                                                                                                                                                                                                                                                                                                                                                                                                                                                                                            | 66.3 | 1.2 (0.1) | 0.0 (1.0) | 1.4 (2.7) | 24.6 | 1.2 (0.1) | 0.0 (1.0) | 1.5 (4.0) |
| R Inferior Frontal Orbital Gyrus                                                                                                                                                                                                                                                                                                                                                                                                                                                                                            | 66.2 | 1.2 (0.1) | 0.0 (1.0) | 1.4 (2.7) | 24.7 | 1.2 (0.1) | 0.0 (1.0) | 1.4 (3.5) |
| L Inferior Frontal Angular Gyrus                                                                                                                                                                                                                                                                                                                                                                                                                                                                                            | 67.7 | 1.2 (0.1) | 0.0 (1.0) | 1.4 (2.6) | 24.9 | 1.2 (0.1) | 0.0 (1.0) | 1.4 (3.5) |
| R Inferior Frontal Angular Gyrus                                                                                                                                                                                                                                                                                                                                                                                                                                                                                            | 66.0 | 1.2 (0.1) | 0.0 (1.0) | 1.4 (2.9) | 24.6 | 1.2 (0.1) | 0.0 (1.0) | 1.4 (3.6) |
| <i>Medial Prefrontal Cortex</i>                                                                                                                                                                                                                                                                                                                                                                                                                                                                                             |      |           |           |           |      |           |           |           |
| L Superior Medial Frontal Gyrus                                                                                                                                                                                                                                                                                                                                                                                                                                                                                             | 72.0 | 1.2 (0.1) | 0.0 (1.0) | 1.4 (2.7) | 29.2 | 1.2 (0.1) | 0.0 (1.0) | 1.5 (3.9) |
| R Superior Medial Frontal Gyrus                                                                                                                                                                                                                                                                                                                                                                                                                                                                                             | 71.4 | 1.2 (0.1) | 0.0 (1.0) | 1.4 (2.6) | 30.0 | 1.2 (0.1) | 0.0 (1.0) | 1.5 (4.3) |
| L Medial Frontal Cerebrum                                                                                                                                                                                                                                                                                                                                                                                                                                                                                                   | 69.1 | 1.2 (0.1) | 0.0 (1.0) | 1.4 (2.7) | 27.1 | 1.2 (0.1) | 0.0 (1.0) | 1.4 (3.7) |
| R Medial Frontal Cerebrum                                                                                                                                                                                                                                                                                                                                                                                                                                                                                                   | 70.9 | 1.2 (0.1) | 0.0 (1.0) | 1.4 (2.8) | 27.2 | 1.2 (0.1) | 0.0 (1.1) | 1.4 (3.6) |
| <i>Orbitofrontal Prefrontal Cortex</i>                                                                                                                                                                                                                                                                                                                                                                                                                                                                                      |      |           |           |           |      |           |           |           |
| L Lateral Orbital Gyrus                                                                                                                                                                                                                                                                                                                                                                                                                                                                                                     | 65.7 | 1.2 (0.1) | 0.0 (1.0) | 1.4 (2.5) | 24.6 | 1.2 (0.1) | 0.0 (1.0) | 1.5 (3.8) |
| R Lateral Orbital Gyrus                                                                                                                                                                                                                                                                                                                                                                                                                                                                                                     | 65.0 | 1.2 (0.1) | 0.0 (1.0) | 1.4 (2.7) | 24.8 | 1.2 (0.1) | 0.0 (1.0) | 1.5 (4.0) |
| Notes:<br><sup>†</sup> n = 725.<br><sup>‡</sup> x 10 <sup>-3</sup><br>ADAS-Cog 13 = Alzheimer's Disease Assessment Scale–Cognitive Subscale, 13 item; RAVLT = Rey's Auditory Verbal Learning Test; VIF = Variance inflation factor.<br>Poisson regression models include covariates: age, gender, years of education, MMSE score, cholinesterase inhibitor prescription, category fluency for animals and MRI field strength. Pearson residuals additionally visualised on scatter plots and Cook's distance on bar charts. |      |           |           |           |      |           |           |           |

**eFigure 2. Voxel-Based Morphometry (VBM) Design Orthogonality Matrices**

**2A. VBM design orthogonality matrix: False recognition on ADAS-Cog 13**

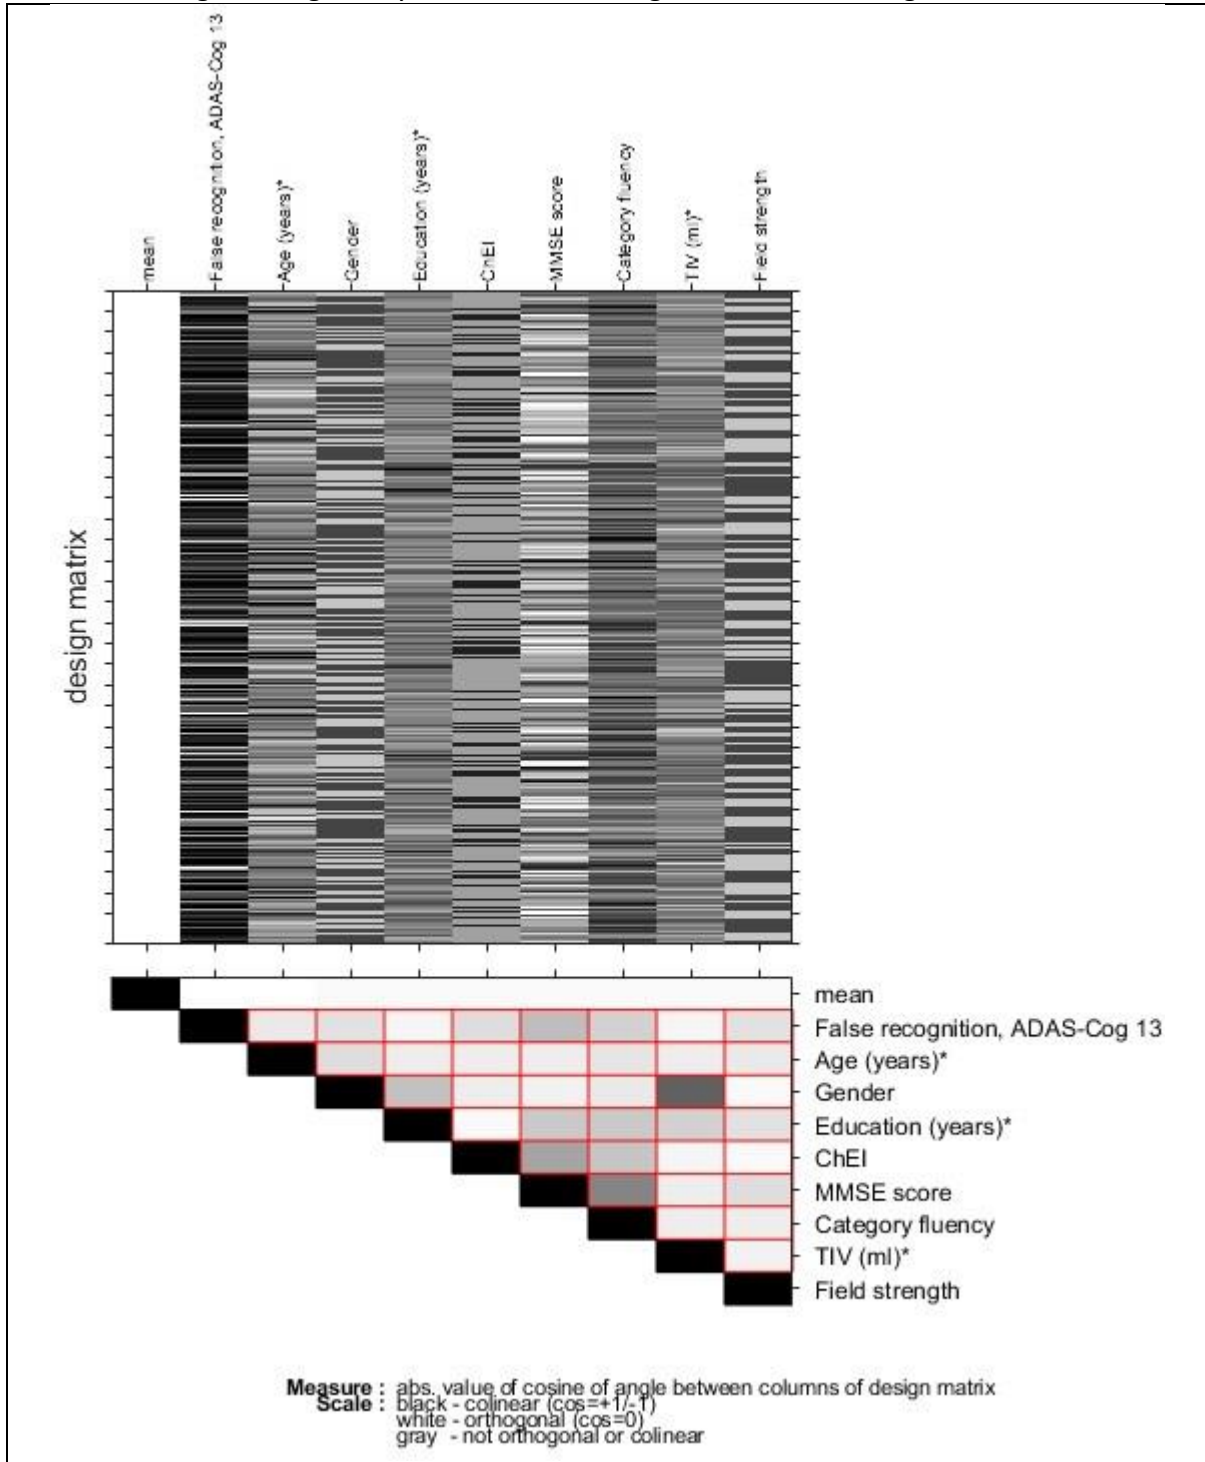

2B. VBM design orthogonality matrix: False recognition on RAVLT

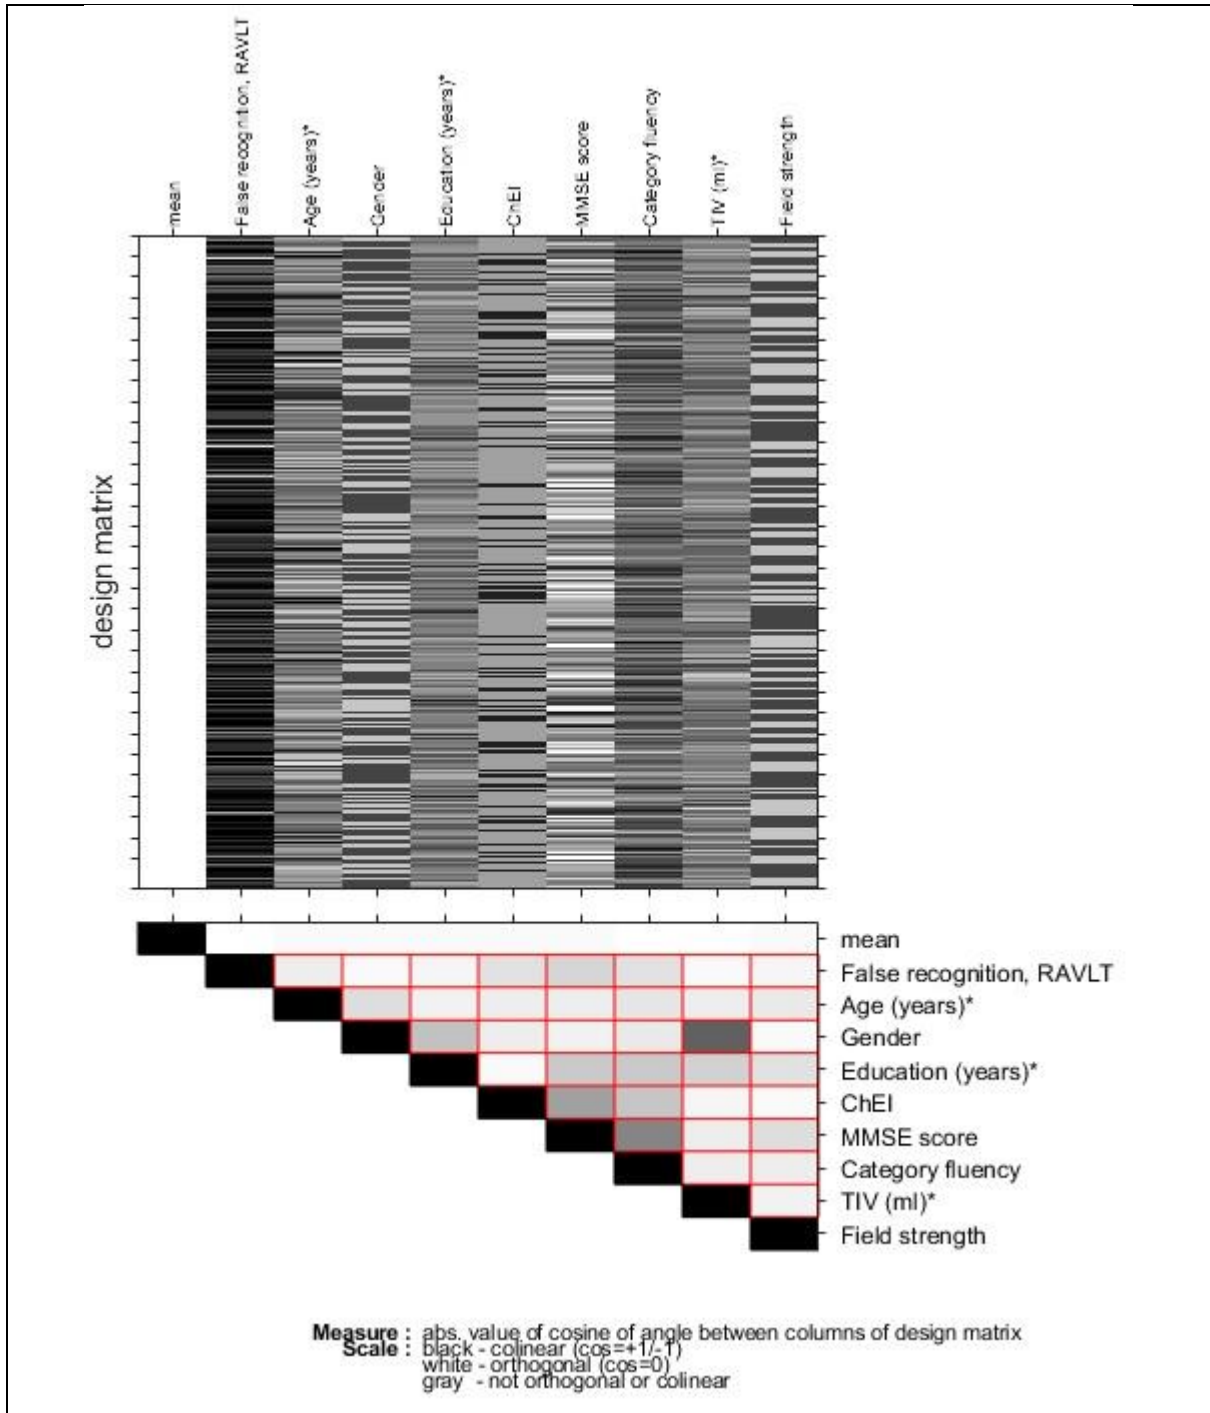

2C. VBM design orthogonality matrix: Intrusions on RAVLT

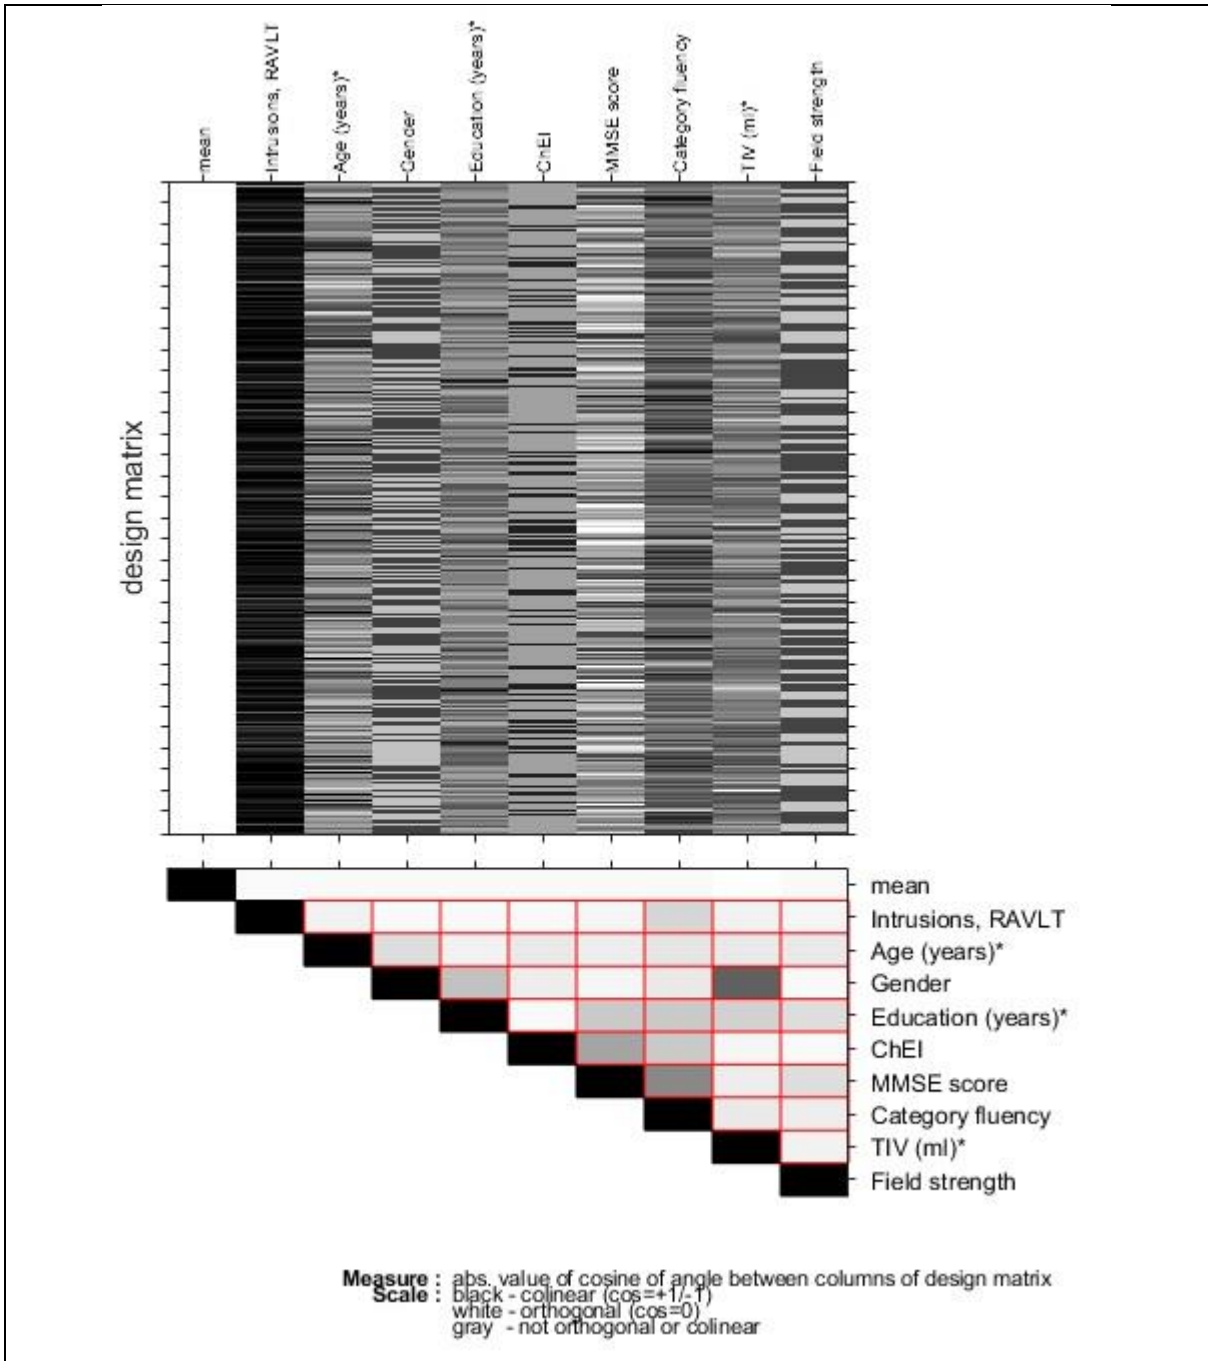

Notes:

\* mean centered variables.

ADAS-Cog 13 = Alzheimer's Disease Assessment Scale-Cognitive Subscale, 13 item; ChEI = cholinesterase inhibitor prescription; MMSE = Mini Mental State Examination; RAVLT = Rey's Auditory Verbal Learning Test; TIV = total intracranial volume.

**eTable 6.** Comparison of Volume in Identified Regions of Interest Between Those With Delusions at Baseline and the Control Group

| Region of Interest                    | Control‡<br>(n = 549) | Delusions<br>at baseline‡<br>(n = 42) | Control vs Delusions at<br>baseline, <i>P</i> Value | Binary logistic regression models ( <i>ps</i> < .05)† |                      |                |                                               |
|---------------------------------------|-----------------------|---------------------------------------|-----------------------------------------------------|-------------------------------------------------------|----------------------|----------------|-----------------------------------------------|
|                                       |                       |                                       |                                                     | One unit =<br>% Mean<br>ROI<br>Volume                 | Odds ratio (95% CI)  | <i>P</i> Value | % change<br>baseline<br>delusions<br>per unit |
| L Hippocampus                         | 1.40 (0.27)           | 1.36 (0.24)                           | $t_{589} = .869, p = .385$                          | 7.4                                                   | 1.026 (.829, 1.180)  | .717           | -                                             |
| R Hippocampus                         | 1.60 (0.32)           | 1.56 (0.29)                           | $t_{589} = .853, p = .394$                          | 6.6                                                   | 1.002 (.891, 1.126)  | .979           | -                                             |
| L Entorhinal Cortex                   | 1.29 (0.28)           | 1.32 (0.29)                           | $t_{589} = -.486, p = .627$                         | 8.1                                                   | 1.122 (.984, 1.278)  | .085           | -                                             |
| R Entorhinal Cortex                   | 1.34 (0.28)           | 1.35 (0.28)                           | $t_{589} = -.332, p = .740$                         | 7.8                                                   | 1.094 (.959, 1.247)  | .182           | -                                             |
| L Anterior Cingulate Gyrus            | 2.63 (0.38)           | 2.55 (0.43)                           | $t_{589} = 1.302, p = .193$                         | 3.9                                                   | .976 (.890, 1.071)   | .612           | -                                             |
| R Anterior Cingulate Gyrus            | 1.99 (0.35)           | 1.87 (0.39)                           | $t_{589} = 2.147, p = .032$                         | 5.2                                                   | .912 (.830, 1.002)   | .054           | -                                             |
| L Superior Parietal Lobule            | 5.41 (0.72)           | 5.56 (0.83)                           | $t_{589} = -1.325, p = .186$                        | 1.9                                                   | 1.045 (.999, 1.093)  | .054           | -                                             |
| R Superior Parietal Lobule            | 5.30 (0.69)           | 5.35 (0.79)                           | $t_{589} = -.429, p = .668$                         | 1.9                                                   | 1.019 (.971, 1.070)  | .442           | -                                             |
| <i>Ventral Visual Stream</i>          |                       |                                       |                                                     |                                                       |                      |                |                                               |
| L Parahippocampal Gyrus               | 1.71 (0.29)           | 1.72 (0.31)                           | $t_{589} = -.206, p = .837$                         | 6.0                                                   | 1.083 (.945, 1.241)  | .254           | -                                             |
| R Parahippocampal Gyrus               | 1.70 (0.30)           | 1.75 (0.34)                           | $t_{589} = .259, p = .259$                          | 6.1                                                   | 1.146 (1.002, 1.311) | <b>.047</b>    | 14.6                                          |
| L Fusiform Gyrus                      | 4.38 (0.60)           | 4.39 (0.66)                           | $t_{589} = -.186, p = .853$                         | 2.3                                                   | §                    | -              | -                                             |
| R Fusiform Gyrus                      | 4.28 (0.58)           | 4.25 (0.62)                           | $t_{589} = .343, p = .732$                          | 2.4                                                   | 1.038 (.971, 1.109)  | .278           | -                                             |
| L Lingual Gyrus                       | 4.43 (0.60)           | 4.45 (0.65)                           | $t_{589} = -.189, p = .850$                         | 2.3                                                   | 1.028 (.968, 1.092)  | .365           | -                                             |
| R Lingual Gyrus                       | 4.66 (0.61)           | 4.60 (0.64)                           | $t_{589} = .622, p = .534$                          | 2.2                                                   | .989 (.931, 1.050)   | .722           | -                                             |
| <i>Dorsolateral Prefrontal Cortex</i> |                       |                                       |                                                     |                                                       |                      |                |                                               |
| L Middle Frontal Gyrus                | 9.78 (1.08)           | 9.58 (1.29)                           | $t_{589} = 1.084, p = .279$                         | 1.0                                                   | .991 (.961, 1.021)   | .554           | -                                             |
| R Middle Frontal Gyrus                | 9.72 (1.09)           | 9.53 (1.07)                           | $t_{589} = 1.092, p = .275$                         | 1.0                                                   | .990 (.960, 1.021)   | .526           | -                                             |

|                                                                                                                                                                                                                                                                                                                                                                                                                                                                                                                                                                                                                                                                                                                              |             |             |                             |      |                     |      |   |
|------------------------------------------------------------------------------------------------------------------------------------------------------------------------------------------------------------------------------------------------------------------------------------------------------------------------------------------------------------------------------------------------------------------------------------------------------------------------------------------------------------------------------------------------------------------------------------------------------------------------------------------------------------------------------------------------------------------------------|-------------|-------------|-----------------------------|------|---------------------|------|---|
| L Superior Frontal Gyrus                                                                                                                                                                                                                                                                                                                                                                                                                                                                                                                                                                                                                                                                                                     | 7.85 (0.85) | 7.68 (0.76) | $t_{589} = 1.274, p = .203$ | 1.3  | .979 (.940, 1.020)  | .320 | - |
| R Superior Frontal Gyrus                                                                                                                                                                                                                                                                                                                                                                                                                                                                                                                                                                                                                                                                                                     | 7.88 (0.85) | 7.79 (0.83) | $t_{589} = 0.615, p = .539$ | 1.3  | .994 (.956, 1.034)  | .758 | - |
| <i>Ventrolateral Prefrontal cortex</i>                                                                                                                                                                                                                                                                                                                                                                                                                                                                                                                                                                                                                                                                                       |             |             |                             |      |                     |      |   |
| L Inferior Frontal Gyrus                                                                                                                                                                                                                                                                                                                                                                                                                                                                                                                                                                                                                                                                                                     | 1.80 (0.26) | 1.78 (0.27) | $t_{589} = .362, p = .717$  | 5.7  | .999 (.876, 1.141)  | .994 | - |
| R Inferior Frontal Gyrus                                                                                                                                                                                                                                                                                                                                                                                                                                                                                                                                                                                                                                                                                                     | 1.82 (0.26) | 1.76 (0.24) | $t_{589} = 1.371, p = .171$ | 5.6  | .926 (.814, 1.054)  | .245 | - |
| L Inferior Frontal Orbital Gyrus                                                                                                                                                                                                                                                                                                                                                                                                                                                                                                                                                                                                                                                                                             | 0.87 (0.13) | 0.88 (0.14) | $t_{589} = -.078, p = .938$ | 11.7 | 1.072 (.825, 1.393) | .601 | - |
| R Inferior Frontal Orbital Gyrus                                                                                                                                                                                                                                                                                                                                                                                                                                                                                                                                                                                                                                                                                             | 0.84 (0.12) | 0.84 (0.15) | $t_{589} = .043, p = .966$  | 12.1 | 1.103 (.847, 1.436) | .469 | - |
| L Inferior Frontal Angular Gyrus                                                                                                                                                                                                                                                                                                                                                                                                                                                                                                                                                                                                                                                                                             | 1.79 (0.26) | 1.74 (0.28) | $t_{589} = 1.217, p = .224$ | 5.7  | .926 (.810, 1.058)  | .259 | - |
| R Inferior Frontal Angular Gyrus                                                                                                                                                                                                                                                                                                                                                                                                                                                                                                                                                                                                                                                                                             | 1.83 (0.26) | 1.78 (0.21) | $t_{589} = 1.116, p = .265$ | 5.6  | .938 (.819, 1.074)  | .355 | - |
| <i>Medial Prefrontal Cortex</i>                                                                                                                                                                                                                                                                                                                                                                                                                                                                                                                                                                                                                                                                                              |             |             |                             |      |                     |      |   |
| L Superior Medial Frontal Gyrus                                                                                                                                                                                                                                                                                                                                                                                                                                                                                                                                                                                                                                                                                              | 3.38 (0.39) | 3.30 (0.39) | $t_{589} = 1.319, p = .188$ | 3.0  | .966 (.884, 1.056)  | .450 | - |
| R Superior Medial Frontal Gyrus                                                                                                                                                                                                                                                                                                                                                                                                                                                                                                                                                                                                                                                                                              | 4.11 (0.53) | 4.02 (0.56) | $t_{589} = .990, p = .323$  | 2.5  | .990 (.929, 1.055)  | .763 | - |
| L Medial Frontal Cerebrum                                                                                                                                                                                                                                                                                                                                                                                                                                                                                                                                                                                                                                                                                                    | 0.92 (0.16) | 0.88 (0.15) | $t_{589} = 1.395, p = .164$ | 11.3 | .938 (.760, 1.158)  | .551 | - |
| R Medial Frontal Cerebrum                                                                                                                                                                                                                                                                                                                                                                                                                                                                                                                                                                                                                                                                                                    | 0.97 (0.16) | 0.93 (0.17) | $t_{589} = 1.568, p = .117$ | 10.6 | .928 (.750, 1.148)  | .490 | - |
| <i>Orbitofrontal Prefrontal Cortex</i>                                                                                                                                                                                                                                                                                                                                                                                                                                                                                                                                                                                                                                                                                       |             |             |                             |      |                     |      |   |
| L Lateral Orbital Gyrus                                                                                                                                                                                                                                                                                                                                                                                                                                                                                                                                                                                                                                                                                                      | 1.24 (0.15) | 1.22 (0.16) | $t_{589} = .697, p = .486$  | 8.2  | .966 (.776, 1.203)  | .756 | - |
| R Lateral Orbital Gyrus                                                                                                                                                                                                                                                                                                                                                                                                                                                                                                                                                                                                                                                                                                      | 1.32 (0.16) | 1.29 (0.16) | $t_{589} = 1.288, p = .198$ | 7.7  | .921 (.742, 1.143)  | .455 | - |
| <p>Notes:<br/> <sup>†</sup> n = 589.<br/> <sup>‡</sup> All measures are mean brain volume for specified region of interest, as proportion of total intracranial volume, at baseline x 10<sup>-3</sup>. Expressed as mean (SD). Models included covariates: age, gender, years of education, cholinesterase inhibitor prescription, MMSE score, category fluency for animals and MRI field strength.<br/> Model fit assessed by Hosmer and Lemeshow test, all <i>ps</i> &gt; .05 indicating acceptable model fit except where indicated.<br/> <sup>§</sup> Hosmer and Lemeshow test <i>p</i> &lt; .05, did not proceed to model interpretation.<br/> No <i>p</i> values remained significant after Bonferroni correction.</p> |             |             |                             |      |                     |      |   |
