# Supplementary material
Source: PubMed Central journal article supplement (PMC10209823)
Supplement: jamapsychiatry-e231012-s002.pdf [file jamapsychiatry-e231012-s002.pdf]

**Supplement 2. Nonauthor Collaborators**

\*First name, last name, and suffix (if applicable) are required and will appear in PubMed.

| <b>*Group Name(s): Alzheimer's Disease Neuroimaging Initiative</b> |                   |                              |                  |                                   |                                          |                                                                                                                                      |                                                                                            |
|--------------------------------------------------------------------|-------------------|------------------------------|------------------|-----------------------------------|------------------------------------------|--------------------------------------------------------------------------------------------------------------------------------------|--------------------------------------------------------------------------------------------|
| <b>*First Name and Middle Initial(s)</b>                           | <b>*Last Name</b> | <b>*Suffix (eg, Jr, III)</b> | Academic Degrees | Institution                       | Location (city, state/province, country) | Role or Contribution, eg, chair, principal investigator                                                                              | Group (if more than 1 Group listed in the byline) and/or Subgroup (eg, Steering Committee) |
| Michael W.                                                         | Weiner            |                              | MD               | University of California          | San Francisco, USA                       | Principal Investigator; Executive Committee; Administrative Core; Initial Concept Planning & Development                             |                                                                                            |
| Paul                                                               | Aisen             |                              | MD               | University of Southern California | USA                                      | ATRI Principal Investigator, Director of Coordinating Center Clinical Core; Executive Committee; Clinical Core Leaders/Key Personnel |                                                                                            |
| Ronald                                                             | Petersen          |                              | MD, PhD          | Mayo Clinic                       | Rochester, USA                           | Co Principal Investigator of Clinical Core; Executive Committee; Clinical Core Leaders/Key Personnel; Site Investigator              |                                                                                            |

**Supplement 2. Nonauthor Collaborators**

\*First name, last name, and suffix (if applicable) are required and will appear in PubMed.

| *First Name and Middle Initial(s) | *Last Name | *Suffix (eg, Jr, III) | Academic Degrees | Institution                                         | Location (city, state/province, country) | Role or Contribution, eg, chair, principal investigator       | Group (if more than 1 Group listed in the byline) and/or Subgroup (eg, Steering Committee) |
|-----------------------------------|------------|-----------------------|------------------|-----------------------------------------------------|------------------------------------------|---------------------------------------------------------------|--------------------------------------------------------------------------------------------|
| Clifford R.                       | Jack       | Jr.                   | MD               | Mayo Clinic                                         | Rochester, USA                           | Executive Committee; MRI Core Leaders/Key Personnel           |                                                                                            |
| William                           | Jagust     |                       | MD               | University of California                            | Berkley, USA                             | Executive Committee; PET Core Leaders/Key Personnel           |                                                                                            |
| John Q.                           | Trojanowki |                       | MD, PhD          | University of Pennsylvania                          | USA                                      | Executive Committee; Biomarkers Core Leaders/Key Personnel    |                                                                                            |
| Arthur W.                         | Toga       |                       | PhD              | University of Southern California                   | USA                                      | Executive Committee; Informatics Core Leaders/Key Personnel   |                                                                                            |
| Laurel                            | Beckett    |                       | PhD              | University of California                            | Davis, USA                               | Executive Committee; Biostatistics Core Leaders/Key Personnel |                                                                                            |
| Robert C.                         | Green      |                       | MD, MPH          | Brigham and Women's Hospital/Harvard Medical School | USA                                      | Executive Committee; Data and Publication Committee           |                                                                                            |

**Supplement 2. Nonauthor Collaborators**

\*First name, last name, and suffix (if applicable) are required and will appear in PubMed.

| *First Name and Middle Initial(s) | *Last Name   | *Suffix (eg, Jr, III) | Academic Degrees | Institution                         | Location (city, state/province, country) | Role or Contribution, eg, chair, principal investigator              | Group (if more than 1 Group listed in the byline) and/or Subgroup (eg, Steering Committee) |
|-----------------------------------|--------------|-----------------------|------------------|-------------------------------------|------------------------------------------|----------------------------------------------------------------------|--------------------------------------------------------------------------------------------|
| Andrew J.                         | Saykin       |                       | PsyD             | Indiana University                  | USA                                      | Executive Committee; Generics Core Leaders/Key Personnel             |                                                                                            |
| John C.                           | Morris       |                       | MD               | Washington University               | St Louis, USA                            | Executive Committee; Neuropathology Core Leaders/Key Personnel       |                                                                                            |
| Richard J.                        | Perrin       |                       | MD, PhD          | Washington University               | St Louis, USA                            | Executive Committee; Neuropathology Core Leaders/Key Personnel       |                                                                                            |
| Leslie M.                         | Shaw         |                       | PhD              | University of Pennsylvania          | USA                                      | Executive Committee; Biomarkers Core Leaders/Key Personnel           |                                                                                            |
| Zaven                             | Khachaturian |                       | PhD              | Prevent Alzheimer's Disease         |                                          | ADNI External Advisory Board; Initial Concept Planning & Development |                                                                                            |
| Maria                             | Carrillo     |                       | PhD              | Alzheimer's Association             |                                          | ADNI External Advisory Board                                         |                                                                                            |
| William                           | Potter       |                       | MD               | National Institute of Mental Health |                                          | ADNI External Advisory Board                                         |                                                                                            |
| Lisa                              | Barnes       |                       | PhD              | Rush University                     |                                          | ADNI External Advisory Board                                         |                                                                                            |

**Supplement 2. Nonauthor Collaborators**

\*First name, last name, and suffix (if applicable) are required and will appear in PubMed.

| *First Name and Middle Initial(s) | *Last Name    | *Suffix (eg, Jr, III) | Academic Degrees | Institution                                  | Location (city, state/province, country) | Role or Contribution, eg, chair, principal investigator | Group (if more than 1 Group listed in the byline and/or Subgroup (eg, Steering Committee)) |
|-----------------------------------|---------------|-----------------------|------------------|----------------------------------------------|------------------------------------------|---------------------------------------------------------|--------------------------------------------------------------------------------------------|
| Marie                             | Bernard       |                       | MD               | NIA                                          |                                          | ADNI External Advisory Board                            |                                                                                            |
| Hector                            | González      |                       |                  | University of California                     | San Diego, USA                           | ADNI External Advisory Board                            |                                                                                            |
| Carole                            | Ho            |                       |                  | Denali Therapeutics                          |                                          | ADNI External Advisory Board                            |                                                                                            |
| John K.                           | Hsiao         |                       | MD               | NIH                                          |                                          | ADNI External Advisory Board                            |                                                                                            |
| Jonathan                          | Jackson       |                       | PhD              | Massachusetts General Hospital               | USA                                      | ADNI External Advisory Board                            |                                                                                            |
| Eliezer                           | Masliah       |                       | MD               | NIA                                          |                                          | ADNI External Advisory Board                            |                                                                                            |
| Donna                             | Masterman     |                       | MD               | Biogen                                       |                                          | ADNI External Advisory Board                            |                                                                                            |
| Ozioma                            | Okonkwo       |                       | PhD              | University of Wisconsin                      | Madison, USA                             | ADNI External Advisory Board                            |                                                                                            |
| Richard                           | Perrin        |                       | MD               | Washington University                        | USA                                      | ADNI External Advisory Board                            |                                                                                            |
| Laurie                            | Ryan          |                       | PhD              | NIA                                          |                                          | ADNI External Advisory Board                            |                                                                                            |
| Nina                              | Silverberg    |                       | PhD              | NIA                                          |                                          | ADNI External Advisory Board                            |                                                                                            |
| Adam                              | Fleisher      |                       | MD               | Eli Lilly                                    |                                          | ADNI 3 Private Partner Scientific Board                 |                                                                                            |
| Diana                             | Truran Sacrey |                       |                  | NCIRE/The Veterans Health Research Institute |                                          | Administrative Core                                     |                                                                                            |
| Juliet                            | Fockler       |                       |                  | University of California                     | San Francisco, USA                       | Administrative Core                                     |                                                                                            |

**Supplement 2. Nonauthor Collaborators**

\*First name, last name, and suffix (if applicable) are required and will appear in PubMed.

| *First Name and Middle Initial(s) | *Last Name | *Suffix (eg, Jr, III) | Academic Degrees | Institution                                         | Location (city, state/province, country) | Role or Contribution, eg, chair, principal investigator   | Group (if more than 1 Group listed in the byline) and/or Subgroup (eg, Steering Committee) |
|-----------------------------------|------------|-----------------------|------------------|-----------------------------------------------------|------------------------------------------|-----------------------------------------------------------|--------------------------------------------------------------------------------------------|
| Cat                               | Conti      |                       | BA               | NCIRE/The Veterans Health Research Institute        |                                          | Administrative Core; Resource Allocation Review Committee |                                                                                            |
| Dallas                            | Veitch     |                       | PhD              | NCIRE/The Veterans Health Research Institute        |                                          | Administrative Core                                       |                                                                                            |
| John                              | Neuhaus    |                       | PhD              | University of California                            | San Francisco, USA                       | Administrative Core                                       |                                                                                            |
| Chengshi                          | Jin        |                       | PhD              | University of California                            | San Francisco, USA                       | Administrative Core                                       |                                                                                            |
| Rachel                            | Nosheny    |                       | PhD              | University of California                            | San Francisco, USA                       | Administrative Core                                       |                                                                                            |
| Miriam                            | Ashford    |                       | PhD              | NCIRE/The Veterans Health Research Institute        |                                          | Administrative Core                                       |                                                                                            |
| Derek                             | Flenniken  |                       |                  | NCIRE/The Veterans Health Research Institute        |                                          | Administrative Core                                       |                                                                                            |
| Adrienne                          | Kormos     |                       |                  | NCIRE/The Veterans Health Research Institute        |                                          | Administrative Core                                       |                                                                                            |
| Robert C.                         | Green      |                       | MD, MPH          | Brigham and Women's Hospital/Harvard Medical School | USA                                      | Data and Publications Committee                           |                                                                                            |
| Tom                               | Montine    |                       | MD, PhD          | University of Washington                            | USA                                      | Resource Allocation Review Committee                      |                                                                                            |
| Michael                           | Rafii      |                       | MD, PhD          | University of Southern California                   | USA                                      | Clinical Core Leaders/Key Personnel                       |                                                                                            |

**Supplement 2. Nonauthor Collaborators**

\*First name, last name, and suffix (if applicable) are required and will appear in PubMed.

| *First Name and Middle Initial(s) | *Last Name | *Suffix (eg, Jr, III) | Academic Degrees | Institution                       | Location (city, state/province, country) | Role or Contribution, eg, chair, principal investigator                       | Group (if more than 1 Group listed in the byline and/or Subgroup (eg, Steering Committee)) |
|-----------------------------------|------------|-----------------------|------------------|-----------------------------------|------------------------------------------|-------------------------------------------------------------------------------|--------------------------------------------------------------------------------------------|
| Rema                              | Raman      |                       | PhD              | University of Southern California | USA                                      | Clinical Core Leaders/Key Personnel; ATRI Coordinating Center Clinical Core   |                                                                                            |
| Gustavo                           | Jimenez    |                       | MBS              | University of Southern California | USA                                      | Clinical Core Leaders/Key Personnel                                           |                                                                                            |
| Michael                           | Donohue    |                       | PhD              | University of Southern California | USA                                      | Clinical Core Leaders/Key Personnel; Biostatistics Core Leaders/Key Personnel |                                                                                            |
| Devon                             | Gessert    |                       | BS               | University of Southern California | USA                                      | Clinical Core Leaders/Key Personnel                                           |                                                                                            |
| Jennifer                          | Salazar    |                       | MBS              | University of Southern California | USA                                      | Clinical Core Leaders/Key Personnel                                           |                                                                                            |
| Caileigh                          | Zimmerman  |                       | MS               | University of Southern California | USA                                      | Clinical Core Leaders/Key Personnel                                           |                                                                                            |
| Yuliana                           | Cabrera    |                       | BS               | University of Southern California | USA                                      | Clinical Core Leaders/Key Personnel                                           |                                                                                            |
| Sarah                             | Walter     |                       | MSc              | University of Southern California | USA                                      | Clinical Core Leaders/Key Personnel                                           |                                                                                            |

**Supplement 2. Nonauthor Collaborators**

\*First name, last name, and suffix (if applicable) are required and will appear in PubMed.

| *First Name and Middle Initial(s) | *Last Name   | *Suffix (eg, Jr, III) | Academic Degrees | Institution                       | Location (city, state/province, country) | Role or Contribution, eg, chair, principal investigator | Group (if more than 1 Group listed in the byline) and/or Subgroup (eg, Steering Committee) |
|-----------------------------------|--------------|-----------------------|------------------|-----------------------------------|------------------------------------------|---------------------------------------------------------|--------------------------------------------------------------------------------------------|
| Garrett                           | Miller       |                       | MS               | University of Southern California | USA                                      | Clinical Core Leaders/Key Personnel                     |                                                                                            |
| Godfrey                           | Coker        |                       | MBA, MPH         | University of Southern California | USA                                      | Clinical Core Leaders/Key Personnel                     |                                                                                            |
| Taylor                            | Clanton      |                       | MPH              | University of Southern California | USA                                      | Clinical Core Leaders/Key Personnel                     |                                                                                            |
| Lindsey                           | Hergesheimer |                       | BS               | University of Southern California | USA                                      | Clinical Core Leaders/Key Personnel                     |                                                                                            |
| Stephanie                         | Smith        |                       | BS               | University of Southern California | USA                                      | Clinical Core Leaders/Key Personnel                     |                                                                                            |
| Olusegun                          | Adegoke      |                       | MSc              | University of Southern California | USA                                      | Clinical Core Leaders/Key Personnel                     |                                                                                            |
| Payam                             | Mahboubi     |                       | MPH              | University of Southern California | USA                                      | Clinical Core Leaders/Key Personnel                     |                                                                                            |
| Shelley                           | Moore        |                       | BA               | University of Southern California | USA                                      | Clinical Core Leaders/Key Personnel                     |                                                                                            |
| Jeremy                            | Pizzola      |                       | BA               | University of Southern California | USA                                      | Clinical Core Leaders/Key Personnel                     |                                                                                            |
| Elizabeth                         | Shaffer      |                       | BS               | University of Southern California | USA                                      | Clinical Core Leaders/Key Personnel                     |                                                                                            |

**Supplement 2. Nonauthor Collaborators**

\*First name, last name, and suffix (if applicable) are required and will appear in PubMed.

| *First Name and Middle Initial(s) | *Last Name       | *Suffix (eg, Jr, III) | Academic Degrees | Institution                       | Location (city, state/province, country) | Role or Contribution, eg, chair, principal investigator | Group (if more than 1 Group listed in the byline and/or Subgroup (eg, Steering Committee)) |
|-----------------------------------|------------------|-----------------------|------------------|-----------------------------------|------------------------------------------|---------------------------------------------------------|--------------------------------------------------------------------------------------------|
| Brittany                          | Sloan            |                       | BA               | University of Southern California | USA                                      | Clinical Core Leaders/Key Personnel                     |                                                                                            |
| Danielle                          | Harvey           |                       | PhD              | University of Southern California | Davis, USA                               | Biostatistics Core Leaders/Key Personnel                |                                                                                            |
| Arvin                             | Forghanian-Arani |                       | PhD              | Mayo Clinic                       | USA                                      | MRI Core Leaders/Key Personnel                          |                                                                                            |
| Bret                              | Borowski         |                       | RTR              | Mayo Clinic                       | USA                                      | MRI Core Leaders/Key Personnel                          |                                                                                            |
| Chad                              | Ward             |                       |                  | Mayo Clinic                       | USA                                      | MRI Core Leaders/Key Personnel                          |                                                                                            |
| Christopher                       | Schwarz          |                       | PhD              | Mayo Clinic                       | USA                                      | MRI Core Leaders/Key Personnel                          |                                                                                            |
| David                             | Jones            |                       | MD               | Mayo Clinic                       | USA                                      | MRI Core Leaders/Key Personnel                          |                                                                                            |
| Jeff                              | Gunter           |                       | PhD              | Mayo Clinic                       | USA                                      | MRI Core Leaders/Key Personnel                          |                                                                                            |
| Kejal                             | Kantarci         |                       | MD               | Mayo Clinic                       | USA                                      | MRI Core Leaders/Key Personnel                          |                                                                                            |
| Matthew                           | Senjem           |                       | MS               | Mayo Clinic                       | USA                                      | MRI Core Leaders/Key Personnel                          |                                                                                            |



**Supplement 2. Nonauthor Collaborators**

\*First name, last name, and suffix (if applicable) are required and will appear in PubMed.

| <b>*First Name and Middle Initial(s)</b> | <b>*Last Name</b> | <b>*Suffix (eg, Jr, III)</b> | Academic Degrees | Institution                                          | Location (city, state/province, country) | Role or Contribution, eg, chair, principal investigator | Group (if more than 1 Group listed in the byline) and/or Subgroup (eg, Steering Committee) |
|------------------------------------------|-------------------|------------------------------|------------------|------------------------------------------------------|------------------------------------------|---------------------------------------------------------|--------------------------------------------------------------------------------------------|
| Prashanthi                               | Vemuri            |                              | PhD              | Mayo Clinic                                          | USA                                      | MRI Core Leaders/Key Personnel                          |                                                                                            |
| Robert                                   | Reid              |                              | PhD              | Mayo Clinic                                          | USA                                      | MRI Core Leaders/Key Personnel                          |                                                                                            |
| Nick C.                                  | Fox               |                              | MD               | University College London                            | UK                                       | MRI Core Leaders/Key Personnel                          |                                                                                            |
| Ian                                      | Malone            |                              | PhD              | University College London                            | UK                                       | MRI Core Leaders/Key Personnel                          |                                                                                            |
| Paul                                     | Thompson          |                              | PhD              | University of Southern California                    | USA                                      | MRI Core Leaders/Key Personnel                          |                                                                                            |
| Sophia I.                                | Thomopoulos       |                              | BS               | University of Southern California                    | USA                                      | MRI Core Leaders/Key Personnel                          |                                                                                            |
| Talia M.                                 | Nir               |                              | PhD              | University of Southern California                    | USA                                      | MRI Core Leaders/Key Personnel                          |                                                                                            |
| Neda                                     | Jahanshad         |                              | PhD              | University of Southern California School of Medicine |                                          | MRI Core Leaders/Key Personnel                          |                                                                                            |
| Charles                                  | DeCarli           |                              | MD               | University of California                             | Davis, USA                               | MRI Core Leaders/Key Personnel; Executive Committee     |                                                                                            |

**Supplement 2. Nonauthor Collaborators**

\*First name, last name, and suffix (if applicable) are required and will appear in PubMed.

| *First Name and Middle Initial(s) | *Last Name   | *Suffix (eg, Jr, III) | Academic Degrees | Institution                                          | Location (city, state/province, country) | Role or Contribution, eg, chair, principal investigator                       | Group (if more than 1 Group listed in the byline) and/or Subgroup (eg, Steering Committee) |
|-----------------------------------|--------------|-----------------------|------------------|------------------------------------------------------|------------------------------------------|-------------------------------------------------------------------------------|--------------------------------------------------------------------------------------------|
| Alexander                         | Knaack       |                       | MS               | University of California                             | Davis, USA                               | MRI Core Leaders/Key Personnel                                                |                                                                                            |
| Evan                              | Fletcher     |                       | PhD              | University of California                             | Davis, USA                               | MRI Core Leaders/Key Personnel                                                |                                                                                            |
| Danielle                          | Harvey       |                       | PhD              | University of California                             | Davis, USA                               | MRI Core Leaders/Key Personnel                                                |                                                                                            |
| Duygu                             | Tosun-Turgut |                       | PhD              | University of California                             | San Francisco, USA                       | MRI Core Leaders/Key Personnel                                                |                                                                                            |
| Stephanie                         | Rossi Chen   |                       | BA               | NCIRE / The Veterans Health Research Institute       |                                          | MRI Core Leaders/Key Personnel                                                |                                                                                            |
| Mark                              | Choe         |                       | BS               | NCIRE / The Veterans Health Research Institute       |                                          | MRI Core Leaders/Key Personnel                                                |                                                                                            |
| Karen                             | Crawford     |                       |                  | University of Southern California School of Medicine |                                          | MRI Core Leaders/Key Personnel;<br>Informatics Core Leaders and Key Personnel |                                                                                            |
| Paul A.                           | Yushkevich   |                       | PhD              | University of Pennsylvania                           |                                          | MRI Core Leaders/Key Personnel                                                |                                                                                            |
| Sandhitsu                         | Das          |                       | PhD              | University of Pennsylvania                           |                                          | MRI Core Leaders/Key Personnel                                                |                                                                                            |

**Supplement 2. Nonauthor Collaborators**

\*First name, last name, and suffix (if applicable) are required and will appear in PubMed.

| *First Name and Middle Initial(s) | *Last Name  | *Suffix (eg, Jr, III) | Academic Degrees | Institution                  | Location (city, state/province, country) | Role or Contribution, eg, chair, principal investigator | Group (if more than 1 Group listed in the byline) and/or Subgroup (eg, Steering Committee) |
|-----------------------------------|-------------|-----------------------|------------------|------------------------------|------------------------------------------|---------------------------------------------------------|--------------------------------------------------------------------------------------------|
| Robert A.                         | Koepp       |                       | PhD              | University of Michigan       |                                          | PET Core Leaders/Key Personnel; Executive Committee     |                                                                                            |
| Eric M.                           | Reiman      |                       | MD               | Banner Alzheimer's Institute |                                          | PET Core Leaders/Key Personnel                          |                                                                                            |
| Kewei                             | Chen        |                       | PhD              | Banner Alzheimer's Institute |                                          | PET Core Leaders/Key Personnel                          |                                                                                            |
| Chet                              | Mathis      |                       | MD               | University of Pittsburgh     |                                          | PET Core Leaders/Key Personnel                          |                                                                                            |
| Susan                             | Landau      |                       | PhD              | University of California     | Berkley, USA                             | PET Core Leaders/Key Personnel                          |                                                                                            |
| Nigel J.                          | Cairns      |                       | PhD;<br>FRCPATH  | Washington University        | St Louis, USA                            | Neuropathology Core Leaders/Key Personnel               |                                                                                            |
| Erin                              | Householder |                       | MS               | Washington University        | St Louis, USA                            | Neuropathology Core Leaders/Key Personnel               |                                                                                            |
| Erin                              | Franklin    |                       | MS               | Washington University        | St Louis, USA                            | Neuropathology Core Leaders/Key Personnel               |                                                                                            |
| Haley                             | Bernhardt   |                       | BA               | Washington University        | St Louis, USA                            | Neuropathology Core Leaders/Key Personnel               |                                                                                            |

**Supplement 2. Nonauthor Collaborators**

\*First name, last name, and suffix (if applicable) are required and will appear in PubMed.

| <b>*First Name and Middle Initial(s)</b> | <b>*Last Name</b> | <b>*Suffix (eg, Jr, III)</b> | Academic Degrees | Institution                                             | Location (city, state/province, country) | Role or Contribution, eg, chair, principal investigator | Group (if more than 1 Group listed in the byline) and/or Subgroup (eg, Steering Committee) |
|------------------------------------------|-------------------|------------------------------|------------------|---------------------------------------------------------|------------------------------------------|---------------------------------------------------------|--------------------------------------------------------------------------------------------|
| Lisa                                     | Taylor-Reinwald   |                              | BA               | Washington University                                   | St Louis, USA                            | Neuropathology Core Leaders/Key Personnel               |                                                                                            |
| Magdalena                                | Korecka           |                              | PhD              | Perelman School of Medicine, University of Pennsylvania |                                          | Biomarkers Core Leaders/Key Personnel                   |                                                                                            |
| Michal                                   | Figurski          |                              | PhD              | Perelman School of Medicine, University of Pennsylvania |                                          | Biomarkers Core Leaders/Key Personnel                   |                                                                                            |
| Karen                                    | Crawford          |                              |                  | University of Southern California                       |                                          | Informatics Core Leaders/Key Personnel                  |                                                                                            |
| Scott Neu                                | Neu               |                              | PhD              | University of Southern California                       |                                          | Informatics Core Leaders/Key Personnel                  |                                                                                            |
| Kwangsik                                 | Nho               |                              | PhD              | Indiana University School of Medicine                   |                                          | Genetics Core Leaders/Key Personnel                     |                                                                                            |
| Shannon L.                               | Risacher          |                              | PhD              | Indiana University School of Medicine                   |                                          | Genetics Core Leaders/Key Personnel                     |                                                                                            |
| Liana G.                                 | Apostolova        |                              | MD               | Indiana University School of Medicine                   |                                          | Genetics Core Leaders/Key Personnel                     |                                                                                            |
| Li                                       | Shen              |                              | PhD              | University of Pennsylvania                              |                                          | Genetics Core Leaders/Key Personnel                     |                                                                                            |
| Tatiana M.                               | Foroud            |                              | PhD              | NCRAD/Indiana University School of Medicine             |                                          | Genetics Core Leaders/Key Personnel                     |                                                                                            |

**Supplement 2. Nonauthor Collaborators**

\*First name, last name, and suffix (if applicable) are required and will appear in PubMed.

| *First Name and Middle Initial(s) | *Last Name | *Suffix (eg, Jr, III) | Academic Degrees | Institution                                 | Location (city, state/province, country) | Role or Contribution, eg, chair, principal investigator | Group (if more than 1 Group listed in the byline and/or Subgroup (eg, Steering Committee)) |
|-----------------------------------|------------|-----------------------|------------------|---------------------------------------------|------------------------------------------|---------------------------------------------------------|--------------------------------------------------------------------------------------------|
| Kelly                             | Nudelman   |                       | PhD              | NCRAD/Indiana University School of Medicine |                                          | Genetics Core Leaders/Key Personnel                     |                                                                                            |
| Kelley                            | Faber      |                       | MS               | NCRAD/Indiana University School of Medicine |                                          | Genetics Core Leaders/Key Personnel                     |                                                                                            |
| Kristi                            | Wilmes     |                       | MS               | NCRAD/Indiana University School of Medicine |                                          | Genetics Core Leaders/Key Personnel                     |                                                                                            |
| Leon                              | Thal       |                       | MD               | University of California                    | San Diego, USA                           | Initial Concept Planning & Development                  |                                                                                            |
| John K.                           | Hsiao      |                       | MD               | NIA                                         |                                          | NIA                                                     |                                                                                            |
| Lisa C.                           | Silbert    |                       | MD               | Oregon Health & Science University          | USA                                      | Site Investigator                                       |                                                                                            |
| Betty                             | Lind       |                       | BS               | Oregon Health & Science University          | USA                                      | Site Investigator                                       |                                                                                            |
| Rachel                            | Crissey    |                       |                  | Oregon Health & Science University          | USA                                      | Site Investigator                                       |                                                                                            |
| Jeffrey A.                        | Kaye       |                       | MD               | Oregon Health & Science University          | USA                                      | Site Investigator                                       |                                                                                            |
| Raina                             | Carter     |                       | BA               | Oregon Health & Science University          | USA                                      | Site Investigator                                       |                                                                                            |
| Sara                              | Dolen      |                       | BS               | Oregon Health & Science University          | USA                                      | Site Investigator                                       |                                                                                            |
| Joseph                            | Quinn      |                       | MD               | Oregon Health & Science University          | USA                                      | Site Investigator                                       |                                                                                            |
| Lon S.                            | Schneider  |                       | MD               | University of Southern California           | USA                                      | Site Investigator                                       |                                                                                            |
| Sonia                             | Pawluczyk  |                       | MD               | University of Southern California           | USA                                      | Site Investigator                                       |                                                                                            |

**Supplement 2. Nonauthor Collaborators**

\*First name, last name, and suffix (if applicable) are required and will appear in PubMed.

| *First Name and Middle Initial(s) | *Last Name       | *Suffix (eg, Jr, III) | Academic Degrees | Institution                       | Location (city, state/province, country) | Role or Contribution, eg, chair, principal investigator | Group (if more than 1 Group listed in the byline and/or Subgroup (eg, Steering Committee)) |
|-----------------------------------|------------------|-----------------------|------------------|-----------------------------------|------------------------------------------|---------------------------------------------------------|--------------------------------------------------------------------------------------------|
| Mauricio                          | Becerra          |                       | MD               | University of Southern California | USA                                      | Site Investigator                                       |                                                                                            |
| Liberty                           | Teodoro          |                       | RN               | University of Southern California | USA                                      | Site Investigator                                       |                                                                                            |
| Karen                             | Dagerman         |                       | MS               | University of Southern California | USA                                      | Site Investigator                                       |                                                                                            |
| Bryan M.                          | Spann            |                       | PhD              | University of Southern California | USA                                      | Site Investigator                                       |                                                                                            |
| James                             | Brewer           |                       | MD, PhD          | University of California          | San Diego, USA                           | Site Investigator                                       |                                                                                            |
| Helen                             | Vanderswag       |                       | RN               | University of California          | San Diego, USA                           | Site Investigator                                       |                                                                                            |
| Adam                              | Fleisher         |                       | MD               | University of California          | San Diego, USA                           | Site Investigator                                       |                                                                                            |
| Jaimie                            | Ziolkowski       |                       | MA, BS, TLLP     | University of Michigan            | USA                                      | Site Investigator                                       |                                                                                            |
| Judith L.                         | Heidebrink       |                       | MD, MS           | University of Michigan            | USA                                      | Site Investigator                                       |                                                                                            |
| Lisa                              | Zbizek-Nulph     |                       | MS               | University of Michigan            | USA                                      | Site Investigator                                       |                                                                                            |
| Joanne L.                         | Lord             |                       | LPN, BA, CCRC    | University of Michigan            | USA                                      | Site Investigator                                       |                                                                                            |
| Sara S.                           | Mason            |                       | RN               | Mayo Clinic                       | Rochester, USA                           | Site Investigator                                       |                                                                                            |
| Colleen S.                        | Albers           |                       | RN               | Mayo Clinic                       | Rochester, USA                           | Site Investigator                                       |                                                                                            |
| David                             | Knopman          |                       | MD               | Mayo Clinic                       | Rochester, USA                           | Site Investigator                                       |                                                                                            |
| Kris                              | Johnson          |                       | RN               | Mayo Clinic                       | Rochester, USA                           | Site Investigator                                       |                                                                                            |
| Javier                            | Villanueva-Meyer |                       | MD               | Baylor College of Medicine        |                                          | Site Investigator                                       |                                                                                            |
| Valory                            | Pavlik           |                       | PhD              | Baylor College of Medicine        |                                          | Site Investigator                                       |                                                                                            |
| Nathaniel                         | Pacini           |                       | MA               | Baylor College of Medicine        |                                          | Site Investigator                                       |                                                                                            |
| Ashley                            | Lamb             |                       | MA               | Baylor College of Medicine        |                                          | Site Investigator                                       |                                                                                            |
| Joseph S. Kass                    | Kass             |                       | MD, LD, FAAN     | Baylor College of Medicine        |                                          | Site Investigator                                       |                                                                                            |
| Rachelle S.                       | Doody            |                       | MD, PhD          | Baylor College of Medicine        |                                          | Site Investigator                                       |                                                                                            |
| Victoria Shibley                  | Shibley          |                       | MS               | Baylor College of Medicine        |                                          | Site Investigator                                       |                                                                                            |

**Supplement 2. Nonauthor Collaborators**

\*First name, last name, and suffix (if applicable) are required and will appear in PubMed.

| *First Name and Middle Initial(s) | *Last Name    | *Suffix (eg, Jr, III) | Academic Degrees | Institution                        | Location (city, state/province, country) | Role or Contribution, eg, chair, principal investigator | Group (if more than 1 Group listed in the byline and/or Subgroup (eg, Steering Committee)) |
|-----------------------------------|---------------|-----------------------|------------------|------------------------------------|------------------------------------------|---------------------------------------------------------|--------------------------------------------------------------------------------------------|
| Munir                             | Chowdhury     |                       | MBBS, MS         | Baylor College of Medicine         |                                          | Site Investigator                                       |                                                                                            |
| Susan                             | Rountree      |                       | MD               | Baylor College of Medicine         |                                          | Site Investigator                                       |                                                                                            |
| Mimi                              | Dang          |                       | MD               | Baylor College of Medicine         |                                          | Site Investigator                                       |                                                                                            |
| Yaakov                            | Stern         |                       | PhD              | Columbia University Medical Center |                                          | Site Investigator                                       |                                                                                            |
| Lawrence S.                       | Honig         |                       | MD, PhD          | Columbia University Medical Center |                                          | Site Investigator                                       |                                                                                            |
| Akiva                             | Mintz         |                       | MD, PhD          | Columbia University Medical Center |                                          | Site Investigator                                       |                                                                                            |
| Beau                              | Ances         |                       | MD, PhD, MSc     | Washington University              | St Louis, USA                            | Site Investigator                                       |                                                                                            |
| John C.                           | Morris        |                       | MD               | Washington University              | St Louis, USA                            | Site Investigator                                       |                                                                                            |
| David                             | Winkfield     |                       | BS               | Washington University              | St Louis, USA                            | Site Investigator                                       |                                                                                            |
| Maria                             | Carroll       |                       | RN, MSN, GCNS-BC | Washington University              | St Louis, USA                            | Site Investigator                                       |                                                                                            |
| Georgia                           | Stobbs-Cucchi |                       | RN, CCRP         | Washington University              | St Louis, USA                            | Site Investigator                                       |                                                                                            |
| Angela                            | Oliver        |                       | RN, BSN, MSG     | Washington University              | St Louis, USA                            | Site Investigator                                       |                                                                                            |
| Mary L.                           | Creech        |                       | RN, MSW          | Washington University              | St Louis, USA                            | Site Investigator                                       |                                                                                            |
| Mark A.                           | Mintun        |                       | MD               | Washington University              | St Louis, USA                            | Site Investigator                                       |                                                                                            |
| Stacy                             | Schneider     |                       | APRN, BC, GNP    | Washington University              | St Louis, USA                            | Site Investigator                                       |                                                                                            |
| David                             | Geldmacher    |                       | MD               | University of Alabama              | Birmingham, USA                          | Site Investigator                                       |                                                                                            |
| Marissa                           | Natelson Love |                       | MD               | University of Alabama              | Birmingham, USA                          | Site Investigator                                       |                                                                                            |
| Randall                           | Griffith      |                       | PhD, ABPP        | University of Alabama              | Birmingham, USA                          | Site Investigator                                       |                                                                                            |
| David                             | Clark         |                       | MD               | University of Alabama              | Birmingham, USA                          | Site Investigator                                       |                                                                                            |
| John                              | Brockington   |                       | MD               | University of Alabama              | Birmingham, USA                          | Site Investigator                                       |                                                                                            |
| Daniel                            | Marson        |                       | JD, PhD          | University of Alabama              | Birmingham, USA                          | Site Investigator                                       |                                                                                            |

**Supplement 2. Nonauthor Collaborators**

\*First name, last name, and suffix (if applicable) are required and will appear in PubMed.

| *First Name and Middle Initial(s) | *Last Name  | *Suffix (eg, Jr, III) | Academic Degrees | Institution                                                        | Location (city, state/province, country) | Role or Contribution, eg, chair, principal investigator | Group (if more than 1 Group listed in the byline and/or Subgroup (eg, Steering Committee)) |
|-----------------------------------|-------------|-----------------------|------------------|--------------------------------------------------------------------|------------------------------------------|---------------------------------------------------------|--------------------------------------------------------------------------------------------|
| Hillel                            | Grossman    |                       | MD               | Mount Sinai School of Medicine                                     |                                          | Site Investigator                                       |                                                                                            |
| Martin A.                         | Goldstein   |                       | MD               | Mount Sinai School of Medicine                                     |                                          | Site Investigator                                       |                                                                                            |
| Jonathan                          | Greenber    |                       | BA               | Mount Sinai School of Medicine                                     |                                          | Site Investigator                                       |                                                                                            |
| Effie                             | Mitsis      |                       | PhD              | Mount Sinai School of Medicine                                     |                                          | Site Investigator                                       |                                                                                            |
| Raj C.                            | Shah        |                       | MD               | Rush University Medical Center                                     |                                          | Site Investigator                                       |                                                                                            |
| Melissa                           | Lamar       |                       | PhD              | Rush University Medical Center                                     |                                          | Site Investigator                                       |                                                                                            |
| Patricia                          | Samuels     |                       |                  | Rush University Medical Center                                     |                                          | Site Investigator                                       |                                                                                            |
| Ranjan                            | Duara       |                       | MD               | Wien Center                                                        |                                          | Site Investigator                                       |                                                                                            |
| Maria T.                          | Greig-Custo |                       | MD               | Wien Center                                                        |                                          | Site Investigator                                       |                                                                                            |
| Rosemarie                         | Rodriguez   |                       | PhD              | Wien Center                                                        |                                          | Site Investigator                                       |                                                                                            |
| Marilyn                           | Albert      |                       | PhD              | Johns Hopkins University                                           | USA                                      | Site Investigator                                       |                                                                                            |
| Chiadi                            | Onyike      |                       | MD               | Johns Hopkins University                                           | USA                                      | Site Investigator                                       |                                                                                            |
| Leonie                            | Farrington  |                       | RN               | Johns Hopkins University                                           | USA                                      | Site Investigator                                       |                                                                                            |
| Scott                             | Rudow       |                       | BS               | Johns Hopkins University                                           | USA                                      | Site Investigator                                       |                                                                                            |
| Rottislav                         | Brichko     |                       | BS               | Johns Hopkins University                                           | USA                                      | Site Investigator                                       |                                                                                            |
| Stephanie                         | Kielb       |                       | BS               | Johns Hopkins University                                           | USA                                      | Site Investigator                                       |                                                                                            |
| Amanda                            | Smith       |                       | MD               | University of South Florida; USF Health Byrd Alzheimer's Institute | USA                                      | Site Investigator                                       |                                                                                            |
| Balebail                          | Ashok Raj   |                       | MD               | University of South Florida; USF Health Byrd Alzheimer's Institute | USA                                      | Site Investigator                                       |                                                                                            |
| Kristin                           | Fargher     |                       | MD               | University of South Florida; USF Health Byrd Alzheimer's Institute | USA                                      | Site Investigator                                       |                                                                                            |
| Martin                            | Sadowski    |                       | MD, PhD          | New York University                                                | USA                                      | Site Investigator                                       |                                                                                            |
| Thomas                            | Wisniewski  |                       | MD               | New York University                                                | USA                                      | Site Investigator                                       |                                                                                            |
| Melanie                           | Shulman     |                       | MD               | New York University                                                | USA                                      | Site Investigator                                       |                                                                                            |
| Arline                            | Faustin     |                       | MD               | New York University                                                | USA                                      | Site Investigator                                       |                                                                                            |
| Julia                             | Rao         |                       | PhD              | New York University                                                | USA                                      | Site Investigator                                       |                                                                                            |
| Karen M.                          | Castro      |                       | BA               | New York University                                                | USA                                      | Site Investigator                                       |                                                                                            |



**Supplement 2. Nonauthor Collaborators**

\*First name, last name, and suffix (if applicable) are required and will appear in PubMed.

| *First Name and Middle Initial(s) | *Last Name        | *Suffix (eg, Jr, III) | Academic Degrees | Institution                            | Location (city, state/province, country) | Role or Contribution, eg, chair, principal investigator | Group (if more than 1 Group listed in the byline) and/or Subgroup (eg, Steering Committee) |
|-----------------------------------|-------------------|-----------------------|------------------|----------------------------------------|------------------------------------------|---------------------------------------------------------|--------------------------------------------------------------------------------------------|
| Anasztasia                        | Ulysse            |                       | BA               | New York University                    | USA                                      | Site Investigator                                       |                                                                                            |
| Shannon                           | Chen              |                       | BA               | New York University                    | USA                                      | Site Investigator                                       |                                                                                            |
| Mohammed O.                       | Sheikh            |                       | MD               | New York University                    | USA                                      | Site Investigator                                       |                                                                                            |
| Jamika                            | Singleton-Garvin  |                       | CCRP             | New York University                    | USA                                      | Site Investigator                                       |                                                                                            |
| P.                                | Murali Doraiswamy |                       | MBBS, FRCP       | Duke University Medical Center         | USA                                      | Site Investigator                                       |                                                                                            |
| Jeffrey R.                        | Petrella          |                       | MD               | Duke University Medical Center         | USA                                      | Site Investigator                                       |                                                                                            |
| Olga                              | James             |                       | MD               | Duke University Medical Center         | USA                                      | Site Investigator                                       |                                                                                            |
| Terence Z.                        | Wong              |                       | MD               | Duke University Medical Center         | USA                                      | Site Investigator                                       |                                                                                            |
| Salvador                          | Borges-Neto       |                       | MD               | Duke University Medical Center         | USA                                      | Site Investigator                                       |                                                                                            |
| Jason H.                          | Karlawish         |                       | MD               | University of Pennsylvania             | USA                                      | Site Investigator                                       |                                                                                            |
| David A.                          | Wolk              |                       | MD               | University of Pennsylvania             | USA                                      | Site Investigator                                       |                                                                                            |
| Sanjeev                           | Vaishnavi         |                       | MD               | University of Pennsylvania             | USA                                      | Site Investigator                                       |                                                                                            |
| Christopher M.                    | Clark             |                       | MD               | University of Pennsylvania             | USA                                      | Site Investigator                                       |                                                                                            |
| Steven E.                         | Arnold            |                       | MD               | University of Pennsylvania             | USA                                      | Site Investigator                                       |                                                                                            |
| Charles D.                        | Smith             |                       | MD               | University of Kentucky                 | USA                                      | Site Investigator                                       |                                                                                            |
| Gregory A.                        | Jicha             |                       | MD, PhD          | University of Kentucky                 | USA                                      | Site Investigator                                       |                                                                                            |
| Riham                             | El Khouli         |                       | MD               | University of Kentucky                 | USA                                      | Site Investigator                                       |                                                                                            |
| Flavius D.                        | Raslau            |                       | MD               | University of Kentucky                 | USA                                      | Site Investigator                                       |                                                                                            |
| Oscar L.                          | Lopez             |                       | MD               | University of Pittsburgh               | USA                                      | Site Investigator                                       |                                                                                            |
| MaryAnn                           | Oakley            |                       | MA               | University of Pittsburgh               | USA                                      | Site Investigator                                       |                                                                                            |
| Donna M.                          | Simpson           |                       | CRNP, MPH        | University of Pittsburgh               | USA                                      | Site Investigator                                       |                                                                                            |
| Anton P.                          | Porsteinsson      |                       | MD               | University of Rochester Medical Center | USA                                      | Site Investigator                                       |                                                                                            |
| Kim                               | Martin            |                       | RN               | University of Rochester Medical Center | USA                                      | Site Investigator                                       |                                                                                            |
| Nancy                             | Kowalski          |                       | MS, RNC          | University of Rochester Medical Center | USA                                      | Site Investigator                                       |                                                                                            |

**Supplement 2. Nonauthor Collaborators**

\*First name, last name, and suffix (if applicable) are required and will appear in PubMed.

| *First Name and Middle Initial(s) | *Last Name    | *Suffix (eg, Jr, III) | Academic Degrees | Institution                                     | Location (city, state/province, country) | Role or Contribution, eg, chair, principal investigator | Group (if more than 1 Group listed in the byline and/or Subgroup (eg, Steering Committee)) |
|-----------------------------------|---------------|-----------------------|------------------|-------------------------------------------------|------------------------------------------|---------------------------------------------------------|--------------------------------------------------------------------------------------------|
| Melanie                           | Keltz         |                       | RN               | University of Rochester Medical Center          | USA                                      | Site Investigator                                       |                                                                                            |
| Bonnie S.                         | Goldstein     |                       | MS, NP           | University of Rochester Medical Center          | USA                                      | Site Investigator                                       |                                                                                            |
| Kelly M.                          | Makino        |                       | BS               | University of Rochester Medical Center          | USA                                      | Site Investigator                                       |                                                                                            |
| M.                                | Seleem Ismail |                       | MD               | University of Rochester Medical Center          | USA                                      | Site Investigator                                       |                                                                                            |
| Connie                            | Brand         |                       | RN               | University of Rochester Medical Center          | USA                                      | Site Investigator                                       |                                                                                            |
| Gaby                              | Thai          |                       | MD               | University of California                        | Irvine, USA                              | Site Investigator                                       |                                                                                            |
| Aimee                             | Pierce        |                       | MD               | University of California                        | Irvine, USA                              | Site Investigator                                       |                                                                                            |
| Beatriz                           | Yanez         |                       | RN               | University of California                        | Irvine, USA                              | Site Investigator                                       |                                                                                            |
| Elizabeth                         | Sosa          |                       | PhD              | University of California                        | Irvine, USA                              | Site Investigator                                       |                                                                                            |
| Megan                             | Witbracht     |                       | PhD              | University of California                        | Irvine, USA                              | Site Investigator                                       |                                                                                            |
| Brendan                           | Kelley        |                       | MD               | University of Texas Southwestern Medical School | USA                                      | Site Investigator                                       |                                                                                            |
| Trung                             | Nguyen        |                       | MD               | University of Texas Southwestern Medical School | USA                                      | Site Investigator                                       |                                                                                            |
| Kyle                              | Womack        |                       | MD               | University of Texas Southwestern Medical School | USA                                      | Site Investigator                                       |                                                                                            |
| Dana                              | Mathews       |                       | MD, PhD          | University of Texas Southwestern Medical School | USA                                      | Site Investigator                                       |                                                                                            |
| Mary                              | Quiceno       |                       | MD               | University of Texas Southwestern Medical School | USA                                      | Site Investigator                                       |                                                                                            |
| Allan I.                          | Levey         |                       | MD, PhD          | Emory University                                |                                          | Site Investigator                                       |                                                                                            |
| James J.                          | Lah           |                       | MD, PhD          | Emory University                                |                                          | Site Investigator                                       |                                                                                            |
| Ihab                              | Hajjar        |                       | MD               | Emory University                                |                                          | Site Investigator                                       |                                                                                            |
| Janet S.                          | Cellar        |                       | DNP, PMHCNS-BC   | Emory University                                |                                          | Site Investigator                                       |                                                                                            |

**Supplement 2. Nonauthor Collaborators**

\*First name, last name, and suffix (if applicable) are required and will appear in PubMed.

| *First Name and Middle Initial(s) | *Last Name    | *Suffix (eg, Jr, III) | Academic Degrees     | Institution                         | Location (city, state/province, country) | Role or Contribution, eg, chair, principal investigator | Group (if more than 1 Group listed in the byline and/or Subgroup (eg, Steering Committee)) |
|-----------------------------------|---------------|-----------------------|----------------------|-------------------------------------|------------------------------------------|---------------------------------------------------------|--------------------------------------------------------------------------------------------|
| Jeffrey M.                        | Burns         |                       | MD                   | University of Kansas Medical Center | USA                                      | Site Investigator                                       |                                                                                            |
| Russell H.                        | Swerdlow      |                       | MD                   | University of Kansas Medical Center | USA                                      | Site Investigator                                       |                                                                                            |
| William M.                        | Brooks        |                       | PhD                  | University of Kansas Medical Center | USA                                      | Site Investigator                                       |                                                                                            |
| Daniel H.S.                       | Silverman     |                       | MD, PhD              | University of California            | Los Angeles, USA                         | Site Investigator                                       |                                                                                            |
| Sarah                             | Kremen        |                       | MD                   | University of California            | Los Angeles, USA                         | Site Investigator                                       |                                                                                            |
| Liana                             | Apostolova    |                       | MD                   | University of California            | Los Angeles, USA                         | Site Investigator                                       |                                                                                            |
| Kathleen                          | Tingus        |                       | PhD                  | University of California            | Los Angeles, USA                         | Site Investigator                                       |                                                                                            |
| Po H.                             | Lu            |                       | PsyD                 | University of California            | Los Angeles, USA                         | Site Investigator                                       |                                                                                            |
| George                            | Bartzokis     |                       | MD                   | University of California            | Los Angeles, USA                         | Site Investigator                                       |                                                                                            |
| Ellen                             | Woo           |                       | PhD                  | University of California            | Los Angeles, USA                         | Site Investigator                                       |                                                                                            |
| Edmond                            | Teng          |                       | MD, PhD              | University of California            | Los Angeles, USA                         | Site Investigator                                       |                                                                                            |
| Neill R                           | Graff-Radford |                       | MBBCH, FRCP (London) | Mayo Clinic                         | Jacksonville, USA                        | Site Investigator                                       |                                                                                            |
| Francine                          | Parfitt       |                       | MSH, CCRC            | Mayo Clinic                         | Jacksonville, USA                        | Site Investigator                                       |                                                                                            |
| Kim                               | Poki-Walker   |                       | BA                   | Mayo Clinic                         | Jacksonville, USA                        | Site Investigator                                       |                                                                                            |
| Martin R.                         | Farlow        |                       | MD                   | Indiana University                  | USA                                      | Site Investigator                                       |                                                                                            |
| Ann Marie                         | Hake          |                       | MD                   | Indiana University                  | USA                                      | Site Investigator                                       |                                                                                            |
| Brandy R.                         | Matthews      |                       | MD                   | Indiana University                  | USA                                      | Site Investigator                                       |                                                                                            |
| Jared R.                          | Brosch        |                       | MD                   | Indiana University                  | USA                                      | Site Investigator                                       |                                                                                            |
| Scott                             | Herring       |                       | RN, CCRC             | Indiana University                  | USA                                      | Site Investigator                                       |                                                                                            |
| Christopher H.                    | van Dyck      |                       | MD                   | Yale University School of Medicine  | USA                                      | Site Investigator                                       |                                                                                            |
| Adam P.                           | Mecca         |                       | MD, PhD              | Yale University School of Medicine  | USA                                      | Site Investigator                                       |                                                                                            |
| Susan P.                          | Good          |                       | APRN                 | Yale University School of Medicine  | USA                                      | Site Investigator                                       |                                                                                            |

**Supplement 2. Nonauthor Collaborators**

\*First name, last name, and suffix (if applicable) are required and will appear in PubMed.

| *First Name and Middle Initial(s) | *Last Name   | *Suffix (eg, Jr, III) | Academic Degrees    | Institution                                         | Location (city, state/province, country) | Role or Contribution, eg, chair, principal investigator | Group (if more than 1 Group listed in the byline and/or Subgroup (eg, Steering Committee)) |
|-----------------------------------|--------------|-----------------------|---------------------|-----------------------------------------------------|------------------------------------------|---------------------------------------------------------|--------------------------------------------------------------------------------------------|
| Martha G.                         | MacAvoy      |                       | PhD                 | Yale University School of Medicine                  | USA                                      | Site Investigator                                       |                                                                                            |
| Richard E.                        | Carson       |                       | PhD                 | Yale University School of Medicine                  | USA                                      | Site Investigator                                       |                                                                                            |
| Pradeep                           | Varma        |                       | MD                  | Yale University School of Medicine                  | USA                                      | Site Investigator                                       |                                                                                            |
| Howard                            | Chertkow     |                       | MD                  | McGill University, Montreal-Jewish General Hospital | Canada                                   | Site Investigator                                       |                                                                                            |
| Susan                             | Vaitekunis   |                       | MD                  | McGill University, Montreal-Jewish General Hospital | Canada                                   | Site Investigator                                       |                                                                                            |
| Chris                             | Hosein       |                       | MEd                 | McGill University, Montreal-Jewish General Hospital | Canada                                   | Site Investigator                                       |                                                                                            |
| Sandra                            | Black        |                       | MD, FRCPC           | Sunnybrook Health Services                          | Ontario, Canada                          | Site Investigator                                       |                                                                                            |
| Bojana                            | Stefanovic   |                       | PhD                 | Sunnybrook Health Services                          | Ontario, Canada                          | Site Investigator                                       |                                                                                            |
| Chris (Chinthaka)                 | Heyn         |                       | BSc, PhD, MD, FRCPC | Sunnybrook Health Services                          | Ontario, Canada                          | Site Investigator                                       |                                                                                            |
| Ging-Yuek                         | Robin Hsiung |                       | MD, MHSc, FRCPC     | UBC Clinic for AD and Related Disorders             |                                          | Site Investigator                                       |                                                                                            |
| Ellen                             | Kim          |                       | BA                  | UBC Clinic for AD and Related Disorders             |                                          | Site Investigator                                       |                                                                                            |
| Benita                            | Mudge        |                       | BS                  | UBC Clinic for AD and Related Disorders             |                                          | Site Investigator                                       |                                                                                            |
| Vesna                             | Sossi        |                       | PhD                 | UBC Clinic for AD and Related Disorders             |                                          | Site Investigator                                       |                                                                                            |
| Howard                            | Feldman      |                       | MD, FRCPC           | UBC Clinic for AD and Related Disorders             |                                          | Site Investigator                                       |                                                                                            |
| Michele                           | Assaly       |                       | MA                  | UBC Clinic for AD and Related Disorders             |                                          | Site Investigator                                       |                                                                                            |

**Supplement 2. Nonauthor Collaborators**

\*First name, last name, and suffix (if applicable) are required and will appear in PubMed.

| *First Name and Middle Initial(s) | *Last Name     | *Suffix (eg, Jr, III) | Academic Degrees | Institution                          | Location (city, state/province, country) | Role or Contribution, eg, chair, principal investigator | Group (if more than 1 Group listed in the byline and/or Subgroup (eg, Steering Committee)) |
|-----------------------------------|----------------|-----------------------|------------------|--------------------------------------|------------------------------------------|---------------------------------------------------------|--------------------------------------------------------------------------------------------|
| Elizabeth                         | Finger         |                       | MD               | St Joseph's Health Care              |                                          | Site Investigator                                       |                                                                                            |
| Stephen                           | Pasternak      |                       | MD               | St Joseph's Health Care              |                                          | Site Investigator                                       |                                                                                            |
| Irina                             | Rachinsky      |                       | MD               | St Joseph's Health Care              |                                          | Site Investigator                                       |                                                                                            |
| Andrew                            | Kertesz        |                       | MD               | St Joseph's Health Care              |                                          | Site Investigator                                       |                                                                                            |
| Dick                              | Drost          |                       | MD               | St Joseph's Health Care              |                                          | Site Investigator                                       |                                                                                            |
| John                              | Rogers         |                       | MD               | St Joseph's Health Care              |                                          | Site Investigator                                       |                                                                                            |
| Ian                               | Grant          |                       | MD               | Northwestern University              |                                          | Site Investigator                                       |                                                                                            |
| Brittanie                         | Muse           |                       | MSPH             | Northwestern University              |                                          | Site Investigator                                       |                                                                                            |
| Emily                             | Rogalski       |                       | PhD              | Northwestern University              |                                          | Site Investigator                                       |                                                                                            |
| Jordan                            | Robson         |                       |                  | Northwestern University              |                                          | Site Investigator                                       |                                                                                            |
| M.                                | Marsel Mesulam |                       | MD               | Northwestern University              |                                          | Site Investigator                                       |                                                                                            |
| Diana                             | Kerwin         |                       | MD               | Northwestern University              |                                          | Site Investigator                                       |                                                                                            |
| Chuang-Kuo                        | Wu             |                       | MD, PhD          | Northwestern University              |                                          | Site Investigator                                       |                                                                                            |
| Nancy                             | Johnson        |                       | PhD              | Northwestern University              |                                          | Site Investigator                                       |                                                                                            |
| Kristine                          | Liposki        |                       | MA               | Northwestern University              |                                          | Site Investigator                                       |                                                                                            |
| Sandra                            | Weintraub      |                       | PhD              | Northwestern University              |                                          | Site Investigator                                       |                                                                                            |
| Borna                             | Bonakdarpour   |                       | MD               | Northwestern University              |                                          | Site Investigator                                       |                                                                                            |
| Nunzio                            | Pomara         |                       | MD               | Nathan Kline Institute               |                                          | Site Investigator                                       |                                                                                            |
| Raymundo                          | Hernando       |                       | MD               | Nathan Kline Institute               |                                          | Site Investigator                                       |                                                                                            |
| Antero                            | Sarrael        |                       | MD               | Nathan Kline Institute               |                                          | Site Investigator                                       |                                                                                            |
| Howard J.                         | Rosen          |                       | MD               | University of California             | San Francisco, USA                       | Site Investigator                                       |                                                                                            |
| Bruce L.                          | Miller         |                       | MD               | University of California             | San Francisco, USA                       | Site Investigator                                       |                                                                                            |
| David                             | Perry          |                       | MD               | University of California             | San Francisco, USA                       | Site Investigator                                       |                                                                                            |
| Raymond                           | Scott Turner   |                       | MD, PhD          | Georgetown University Medical Center |                                          | Site Investigator                                       |                                                                                            |
| Kathleen                          | Johnson        |                       | NP               | Georgetown University Medical Center |                                          | Site Investigator                                       |                                                                                            |
| Brigid                            | Reynolds       |                       | NP               | Georgetown University Medical Center |                                          | Site Investigator                                       |                                                                                            |

**Supplement 2. Nonauthor Collaborators**

\*First name, last name, and suffix (if applicable) are required and will appear in PubMed.

| *First Name and Middle Initial(s) | *Last Name  | *Suffix (eg, Jr, III) | Academic Degrees | Institution                          | Location (city, state/province, country) | Role or Contribution, eg, chair, principal investigator | Group (if more than 1 Group listed in the byline and/or Subgroup (eg, Steering Committee)) |
|-----------------------------------|-------------|-----------------------|------------------|--------------------------------------|------------------------------------------|---------------------------------------------------------|--------------------------------------------------------------------------------------------|
| Kelly                             | McCann      |                       | BA               | Georgetown University Medical Center |                                          | Site Investigator                                       |                                                                                            |
| Jessica                           | Poe         |                       | BS               | Georgetown University Medical Center |                                          | Site Investigator                                       |                                                                                            |
| Reisa A.                          | Sperling    |                       | MD               | Brigham and Women's Hospital         | USA                                      | Site Investigator                                       |                                                                                            |
| Keith A.                          | Johnson     |                       | MD               | Brigham and Women's Hospital         | USA                                      | Site Investigator                                       |                                                                                            |
| Gad A.                            | Marshall    |                       | MD               | Brigham and Women's Hospital         | USA                                      | Site Investigator                                       |                                                                                            |
| Jerome                            | Yesavage    |                       | MD               | Stanford University                  | USA                                      | Site Investigator                                       |                                                                                            |
| Joy L.                            | Taylor      |                       | PhD              | Stanford University                  | USA                                      | Site Investigator                                       |                                                                                            |
| Steven                            | Chao        |                       | MD, PhD          | Stanford University                  | USA                                      | Site Investigator                                       |                                                                                            |
| Jaila                             | Coleman     |                       | BA               | Stanford University                  | USA                                      | Site Investigator                                       |                                                                                            |
| Jessica D.                        | White       |                       | BA               | Stanford University                  | USA                                      | Site Investigator                                       |                                                                                            |
| Barton                            | Lane        |                       | MD               | Stanford University                  | USA                                      | Site Investigator                                       |                                                                                            |
| Allyson                           | Rosen       |                       | PhD              | Stanford University                  | USA                                      | Site Investigator                                       |                                                                                            |
| Jared                             | Tinklenberg |                       | MD               | Stanford University                  | USA                                      | Site Investigator                                       |                                                                                            |
| Christine M.                      | Belden      |                       | PsyD             | Banner Sun Health Research Institute |                                          | Site Investigator                                       |                                                                                            |
| Alireza                           | Atri        |                       | MD, PhD          | Banner Sun Health Research Institute |                                          | Site Investigator                                       |                                                                                            |
| Bryan M.                          | Spann       |                       | DO, PhD          | Banner Sun Health Research Institute |                                          | Site Investigator                                       |                                                                                            |
| Kelly A.                          | Clark       |                       |                  | Banner Sun Health Research Institute |                                          | Site Investigator                                       |                                                                                            |
| Edward                            | Zamrini     |                       | MD               | Banner Sun Health Research Institute |                                          | Site Investigator                                       |                                                                                            |
| Marwan                            | Sabbagh     |                       | MD               | Banner Sun Health Research Institute |                                          | Site Investigator                                       |                                                                                            |
| Ronald                            | Killiany    |                       | PhD              | Boston University                    | USA                                      | Site Investigator                                       |                                                                                            |
| Robert                            | Stern       |                       | PhD              | Boston University                    | USA                                      | Site Investigator                                       |                                                                                            |
| Jesse                             | Mez         |                       | MD, MS           | Boston University                    | USA                                      | Site Investigator                                       |                                                                                            |
| Neil                              | Kowall      |                       | MD               | Boston University                    | USA                                      | Site Investigator                                       |                                                                                            |

**Supplement 2. Nonauthor Collaborators**

\*First name, last name, and suffix (if applicable) are required and will appear in PubMed.

| *First Name and Middle Initial(s) | *Last Name | *Suffix (eg, Jr, III) | Academic Degrees | Institution                     | Location (city, state/province, country) | Role or Contribution, eg, chair, principal investigator | Group (if more than 1 Group listed in the byline) and/or Subgroup (eg, Steering Committee) |
|-----------------------------------|------------|-----------------------|------------------|---------------------------------|------------------------------------------|---------------------------------------------------------|--------------------------------------------------------------------------------------------|
| Andrew E.                         | Budson     |                       | MD               | Boston University               | USA                                      | Site Investigator                                       |                                                                                            |
| Thomas O.                         | Obisesan   |                       | MD, MPH          | Howard University               |                                          | Site Investigator                                       |                                                                                            |
| Oyonomo E.                        | Ntekim     |                       | MD, PhD          | Howard University               |                                          | Site Investigator                                       |                                                                                            |
| Saba                              | Wolday     |                       | MSc              | Howard University               |                                          | Site Investigator                                       |                                                                                            |
| Javed I.                          | Khan       |                       | MD               | Howard University               |                                          | Site Investigator                                       |                                                                                            |
| Evaristus                         | Nwulia     |                       | MD               | Howard University               |                                          | Site Investigator                                       |                                                                                            |
| Sheeba                            | Nadarajah  |                       | PhD              | Howard University               |                                          | Site Investigator                                       |                                                                                            |
| Alan                              | Lerner     |                       | MD               | Case Western Reserve University |                                          | Site Investigator                                       |                                                                                            |
| Paula                             | Ogrocki    |                       | PhD              | Case Western Reserve University |                                          | Site Investigator                                       |                                                                                            |
| Curtis                            | Tatsuoka   |                       | PhD              | Case Western Reserve University |                                          | Site Investigator                                       |                                                                                            |
| Parianne                          | Fatica     |                       | BA, CCRC         | Case Western Reserve University |                                          | Site Investigator                                       |                                                                                            |
| Evan                              | Fletcher   |                       | PhD              | University of California        | Davis, USA                               | Site Investigator                                       |                                                                                            |
| Pauline                           | Maillard   |                       | PhD              | University of California        | Davis, USA                               | Site Investigator                                       |                                                                                            |
| John                              | Olichney   |                       | MD               | University of California        | Davis, USA                               | Site Investigator                                       |                                                                                            |
| Charles                           | DeCarli    |                       | MD               | University of California        | Davis, USA                               | Site Investigator                                       |                                                                                            |
| Owen                              | Carmichael |                       | PhD              | University of California        | Davis, USA                               | Site Investigator                                       |                                                                                            |
| Vernice                           | Bates      |                       | MD               | Dent Neurologic Institute       |                                          | Site Investigator                                       |                                                                                            |
| Horacio                           | Capote     |                       | MD               | Dent Neurologic Institute       |                                          | Site Investigator                                       |                                                                                            |
| Michelle                          | Rainka     |                       | PharmD, CCRP     | Dent Neurologic Institute       |                                          | Site Investigator                                       |                                                                                            |
| Michael                           | Borrie     |                       | MB ChB           | Parkwood Institute              |                                          | Site Investigator                                       |                                                                                            |
| T-Y                               | Lee        |                       | PhD              | Parkwood Institute              |                                          | Site Investigator                                       |                                                                                            |
| Rob                               | Bartha     |                       | PhD              | Parkwood Institute              |                                          | Site Investigator                                       |                                                                                            |
| Sterling                          | Johnson    |                       | PhD              | University of Wisconsin         |                                          | Site Investigator                                       |                                                                                            |
| Sanjay                            | Asthana    |                       | MD               | University of Wisconsin         |                                          | Site Investigator                                       |                                                                                            |
| Cynthia M.                        | Carlsson   |                       | MD, MS           | University of Wisconsin         |                                          | Site Investigator                                       |                                                                                            |
| Allison                           | Perrin     |                       | PhD              | Banner Alzheimer's Institute    |                                          | Site Investigator                                       |                                                                                            |

**Supplement 2. Nonauthor Collaborators**

\*First name, last name, and suffix (if applicable) are required and will appear in PubMed.

| *First Name and Middle Initial(s) | *Last Name   | *Suffix (eg, Jr, III) | Academic Degrees | Institution                            | Location (city, state/province, country) | Role or Contribution, eg, chair, principal investigator | Group (if more than 1 Group listed in the byline) and/or Subgroup (eg, Steering Committee) |
|-----------------------------------|--------------|-----------------------|------------------|----------------------------------------|------------------------------------------|---------------------------------------------------------|--------------------------------------------------------------------------------------------|
| Anna                              | Burke        |                       | PhD              | Banner Alzheimer's Institute           |                                          | Site Investigator                                       |                                                                                            |
| Douglas W.                        | Scharre      |                       | MD               | Ohio State University                  |                                          | Site Investigator                                       |                                                                                            |
| Maria                             | Kataki       |                       | MD, PhD          | Ohio State University                  |                                          | Site Investigator                                       |                                                                                            |
| Rawan                             | Tarawneh     |                       | MD               | Ohio State University                  |                                          | Site Investigator                                       |                                                                                            |
| Brendan                           | Kelley       |                       | MD               | Ohio State University                  |                                          | Site Investigator                                       |                                                                                            |
| David                             | Hart         |                       | MD               | Albany Medical College                 |                                          | Site Investigator                                       |                                                                                            |
| Earl A.                           | Zimmerman    |                       | MD               | Albany Medical College                 |                                          | Site Investigator                                       |                                                                                            |
| Dzintra                           | Celmins      |                       | MD               | Albany Medical College                 |                                          | Site Investigator                                       |                                                                                            |
| Delwyn D.                         | Miller       |                       | PharmD, MD       | University of Iowa College of Medicine |                                          | Site Investigator                                       |                                                                                            |
| Laura L.                          | Boles        |                       | PhD              | University of Iowa College of Medicine |                                          | Site Investigator                                       |                                                                                            |
| Karen                             | Ekstam Smith |                       | RN               | University of Iowa College of Medicine |                                          | Site Investigator                                       |                                                                                            |
| Hristina                          | Koleva       |                       | MD               | University of Iowa College of Medicine |                                          | Site Investigator                                       |                                                                                            |
| Hyungsub                          | Shim         |                       | MD               | University of Iowa College of Medicine |                                          | Site Investigator                                       |                                                                                            |
| Ki                                | Won Nam      |                       | MD               | University of Iowa College of Medicine |                                          | Site Investigator                                       |                                                                                            |
| Susan K.                          | Schultz      |                       | MD               | University of Iowa College of Medicine |                                          | Site Investigator                                       |                                                                                            |
| Jeff D.                           | Williamson   |                       | MD, MHS          | Wake Forest University Health Sciences |                                          | Site Investigator                                       |                                                                                            |
| Suzanne                           | Craft        |                       | PhD              | Wake Forest University Health Sciences |                                          | Site Investigator                                       |                                                                                            |
| Jo                                | Cleveland    |                       | MD               | Wake Forest University Health Sciences |                                          | Site Investigator                                       |                                                                                            |
| Mia                               | Yang         |                       | MD               | Wake Forest University Health Sciences |                                          | Site Investigator                                       |                                                                                            |



**Supplement 2. Nonauthor Collaborators**

\*First name, last name, and suffix (if applicable) are required and will appear in PubMed.

| *First Name and Middle Initial(s) | *Last Name | *Suffix (eg, Jr, III) | Academic Degrees | Institution                                       | Location (city, state/province, country) | Role or Contribution, eg, chair, principal investigator | Group (if more than 1 Group listed in the byline) and/or Subgroup (eg, Steering Committee) |
|-----------------------------------|------------|-----------------------|------------------|---------------------------------------------------|------------------------------------------|---------------------------------------------------------|--------------------------------------------------------------------------------------------|
| Kaycee M.                         | Sink       |                       | MD, MAS          | Wake Forest University Health Sciences            |                                          | Site Investigator                                       |                                                                                            |
| Brian R.                          | Ott        |                       | MD               | Rhode Island Hospital                             |                                          | Site Investigator                                       |                                                                                            |
| Jonathan                          | Drake      |                       | MD               | Rhode Island Hospital                             |                                          | Site Investigator                                       |                                                                                            |
| Geoffrey                          | Tremont    |                       | PhD              | Rhode Island Hospital                             |                                          | Site Investigator                                       |                                                                                            |
| Lori A.                           | Daiello    |                       | Pharm.D, ScM     | Rhode Island Hospital                             |                                          | Site Investigator                                       |                                                                                            |
| Marwan                            | Sabbagh    |                       | MD               | Cleveland Clinic Lou Ruvo Center for Brain Health |                                          | Site Investigator                                       |                                                                                            |
| Aaron                             | Ritter     |                       | MD               | Cleveland Clinic Lou Ruvo Center for Brain Health |                                          | Site Investigator                                       |                                                                                            |
| Charles                           | Bernick    |                       | MD, MPH          | Cleveland Clinic Lou Ruvo Center for Brain Health |                                          | Site Investigator                                       |                                                                                            |
| Donna                             | Munic      |                       | PhD              | Cleveland Clinic Lou Ruvo Center for Brain Health |                                          | Site Investigator                                       |                                                                                            |
| Akiva                             | Mintz      |                       | MD, PhD          | Cleveland Clinic Lou Ruvo Center for Brain Health |                                          | Site Investigator                                       |                                                                                            |
| Abigail                           | O'Connell  |                       | MS, APRN, FNP-C  | Roper St Francis Healthcare                       |                                          | Site Investigator                                       |                                                                                            |
| Jacobo                            | Mintzer    |                       | MD, MBA          | Roper St Francis Healthcare                       |                                          | Site Investigator                                       |                                                                                            |
| Arthur                            | Williams   |                       | BS               | Roper St Francis Healthcare                       |                                          | Site Investigator                                       |                                                                                            |
| Joseph                            | Masdeu     |                       | PhD              | Houston Methodist Neurological Institute          |                                          | Site Investigator                                       |                                                                                            |
| Jiong                             | Shi        |                       | MD, PhD          | Barrow Neurological Institute                     |                                          | Site Investigator                                       |                                                                                            |
| Angelica                          | Garcia     |                       | BS               | Barrow Neurological Institute                     |                                          | Site Investigator                                       |                                                                                            |
| Marwan                            | Sabbagh    |                       |                  | Barrow Neurological Institute                     |                                          | Site Investigator                                       |                                                                                            |
| Paul                              | Newhouse   |                       | PhD              | Vanderbilt University Medical Center              |                                          | Site Investigator                                       |                                                                                            |

**Supplement 2. Nonauthor Collaborators**

\*First name, last name, and suffix (if applicable) are required and will appear in PubMed.

| *First Name and Middle Initial(s) | *Last Name | *Suffix (eg, Jr, III) | Academic Degrees | Institution                                            | Location (city, state/province, country) | Role or Contribution, eg, chair, principal investigator | Group (if more than 1 Group listed in the byline) and/or Subgroup (eg, Steering Committee) |
|-----------------------------------|------------|-----------------------|------------------|--------------------------------------------------------|------------------------------------------|---------------------------------------------------------|--------------------------------------------------------------------------------------------|
| Steven                            | Potkin     |                       | PhD              | Long Beach VA Neuropsychiatric Research Programme      |                                          | Site Investigator; Genetics Core Leaders/Key Personnel  |                                                                                            |
| Stephen                           | Salloway   |                       | MD, MS           | Butler Hospital Memory and Aging Programme             |                                          | Site Investigator                                       |                                                                                            |
| Paul                              | Malloy     |                       | PhD              | Butler Hospital Memory and Aging Programme             |                                          | Site Investigator                                       |                                                                                            |
| Stephen                           | Correia    |                       | PhD              | Butler Hospital Memory and Aging Programme             |                                          | Site Investigator                                       |                                                                                            |
| Smita                             | Kittur     |                       | MD               | Neurological Care of CNY                               |                                          | Site Investigator                                       |                                                                                            |
| Godfrey D.                        | Pearlson   |                       | MD               | Hartford Hospital Olin Neuropsychiatry Research Center |                                          | Site Investigator                                       |                                                                                            |
| Karen                             | Blank      |                       | MD               | Hartford Hospital Olin Neuropsychiatry Research Center |                                          | Site Investigator                                       |                                                                                            |
| Karen                             | Anderson   |                       | RN               | Hartford Hospital Olin Neuropsychiatry Research Center |                                          | Site Investigator                                       |                                                                                            |
| Laura A.                          | Flashman   |                       | PhD              | Dartmouth-Hitchcock Medical Center                     |                                          | Site Investigator                                       |                                                                                            |
| Marc                              | Seltzer    |                       | MD               | Dartmouth-Hitchcock Medical Center                     |                                          | Site Investigator                                       |                                                                                            |
| Mary L.                           | Hynes      |                       | RN, MPH          | Dartmouth-Hitchcock Medical Center                     |                                          | Site Investigator                                       |                                                                                            |
| Robert B.                         | Santulli   |                       | MD               | Dartmouth-Hitchcock Medical Center                     |                                          | Site Investigator                                       |                                                                                            |
| Norman                            | Relkin     |                       | MD, PhD          | Cornell University                                     |                                          | Site Investigator                                       |                                                                                            |
| Gloria                            | Chiang     |                       | MD               | Cornell University                                     |                                          | Site Investigator                                       |                                                                                            |
| Michael                           | Lin        |                       | MD               | Cornell University                                     |                                          | Site Investigator                                       |                                                                                            |

**Supplement 2. Nonauthor Collaborators**

\*First name, last name, and suffix (if applicable) are required and will appear in PubMed.

| <b>*First Name and Middle Initial(s)</b> | <b>*Last Name</b> | <b>*Suffix (eg, Jr, III)</b> | Academic Degrees | Institution                                                                               | Location (city, state/province, country) | Role or Contribution, eg, chair, principal investigator | Group (if more than 1 Group listed in the byline) and/or Subgroup (eg, Steering Committee) |
|------------------------------------------|-------------------|------------------------------|------------------|-------------------------------------------------------------------------------------------|------------------------------------------|---------------------------------------------------------|--------------------------------------------------------------------------------------------|
| Lisa                                     | Ravdin            |                              | PhD              | Cornell University                                                                        |                                          | Site Investigator                                       |                                                                                            |
| Athena                                   | Lee               |                              | PhD              | Cornell University                                                                        |                                          | Site Investigator                                       |                                                                                            |
| Thomas                                   | Neylan            |                              | MD               | University of California                                                                  | San Francisco, USA                       | Psychological Evaluation/PTSD Core                      |                                                                                            |
| Jordan                                   | Grafman           |                              | PhD              | Rehabilitation Institute of Chicago, Feinberg School of Medicine, Northwestern University |                                          | Traumatic Brain Injury Core                             |                                                                                            |
| Sarah                                    | Danowski          |                              | MA               | University of Southern California                                                         | USA                                      | Clinical Core Leaders/Key Personnel                     |                                                                                            |
| Catherine                                | Nguyen-Barrera    |                              | MS               | University of Southern California                                                         | USA                                      | Clinical Core Leaders/Key Personnel                     |                                                                                            |
| Jacqueline                               | Hayes             |                              |                  | San Francisco Veterans Affairs Medical Center                                             |                                          |                                                         |                                                                                            |
| Shannon                                  | Finley            |                              |                  | San Francisco Veterans Affairs Medical Center                                             |                                          |                                                         |                                                                                            |
| Matthew                                  | Bernstein         |                              | PhD              | Mayo Clinic                                                                               | Rochester, USA                           | MRI Core Leaders/Key Personnel                          |                                                                                            |
| Duygu                                    | Tosun-Turgut      |                              | PhD              | University of California                                                                  | San Francisco, USA                       | MRI Core Leaders/Key Personnel                          |                                                                                            |
| Stephanie                                | Rossi Chen        |                              | BA               | NCIRE/The Veterans Health Research Institute                                              |                                          | MRI Core Leaders/Key Personnel                          |                                                                                            |
| Susan                                    | Landau            |                              | PhD              | University of California                                                                  | Berkley, USA                             | PET Core Leaders/Key Personnel                          |                                                                                            |

**Supplement 2. Nonauthor Collaborators**

\*First name, last name, and suffix (if applicable) are required and will appear in PubMed.

| <b>*First Name and Middle Initial(s)</b> | <b>*Last Name</b> | <b>*Suffix (eg, Jr, III)</b> | Academic Degrees | Institution                    | Location (city, state/province, country) | Role or Contribution, eg, chair, principal investigator | Group (if more than 1 Group listed in the byline and/or Subgroup (eg, Steering Committee)) |
|------------------------------------------|-------------------|------------------------------|------------------|--------------------------------|------------------------------------------|---------------------------------------------------------|--------------------------------------------------------------------------------------------|
| Robert A.                                | Koeppel           |                              | PhD              | University of Michigan         |                                          | PET Core Leaders/Key Personnel                          |                                                                                            |
| Norm                                     | Foster            |                              | MD               | University of Utah             |                                          | PET Core Leaders/Key Personnel                          |                                                                                            |
| Eric M.                                  | Reiman            |                              | MD               | Banner Alzheimer's Institute   |                                          | PET Core Leaders/Key Personnel                          |                                                                                            |
| Kewei                                    | Chen              |                              | PhD              | Banner Alzheimer's Institute   |                                          | PET Core Leaders/Key Personnel                          |                                                                                            |
| Sungeun                                  | Kim               |                              | PhD              | Indiana University             |                                          | Genetics Core Leaders/Key Personnel                     |                                                                                            |
| Ajay                                     | Sood              |                              | MD, PhD          | Rush University Medical Center |                                          | Site Investigator                                       |                                                                                            |
| Kimberly S.                              | Blanchard         |                              | DNP, APRN, NP-C  | Rush University Medical Center |                                          | Site Investigator                                       |                                                                                            |
| Konstantinos                             | Arfanakis         |                              | PhD              | Rush University Medical Center |                                          | Site Investigator                                       |                                                                                            |
| Debra                                    | Fleischman        |                              | PhD              | Rush University Medical Center |                                          | Site Investigator                                       |                                                                                            |
| Daniel                                   | Varon             |                              | MD               | Wein Center                    |                                          | Site Investigator                                       |                                                                                            |
| Christopher                              | Reist             |                              | MD               | University of California       | Irvine, USA                              | Site Investigator                                       |                                                                                            |
| Carl                                     | Sadowsky          |                              | MD               | Premiere Research Institute    |                                          | Site Investigator                                       |                                                                                            |
| Walter                                   | Martinez          |                              | MD               | Premiere Research Institute    |                                          | Site Investigator                                       |                                                                                            |
| Teresa                                   | Villena           |                              | MD               | Premiere Research Institute    |                                          | Site Investigator                                       |                                                                                            |
| Elaine R.                                | Peskind           |                              | MD               | University of Washington       |                                          | Site Investigator                                       |                                                                                            |
| Eric C.                                  | Petrie            |                              | MD, MS           | University of Washington       |                                          | Site Investigator                                       |                                                                                            |
| Gail                                     | Li                |                              | MD, PhD          | University of Washington       |                                          | Site Investigator                                       |                                                                                            |

**Supplement 2. Nonauthor Collaborators**

\*First name, last name, and suffix (if applicable) are required and will appear in PubMed.

| <b>*First Name and Middle Initial(s)</b> | <b>*Last Name</b> | <b>*Suffix (eg, Jr, III)</b> | Academic Degrees | Institution                                         | Location (city, state/province, country) | Role or Contribution, eg, chair, principal investigator | Group (if more than 1 Group listed in the byline) and/or Subgroup (eg, Steering Committee) |
|------------------------------------------|-------------------|------------------------------|------------------|-----------------------------------------------------|------------------------------------------|---------------------------------------------------------|--------------------------------------------------------------------------------------------|
| Abigail                                  | O'Connell         |                              | MS, APRN, FNP-C  | Roper St Francis Healthcare                         |                                          | Site Investigator                                       |                                                                                            |
| Jacobo                                   | Mintzer           |                              | MD, MBA          | Roper St Francis Healthcare                         |                                          | Site Investigator                                       |                                                                                            |
| Arthur                                   | Williams          |                              | BS               | Roper St Francis Healthcare                         |                                          | Site Investigator                                       |                                                                                            |
| Scott                                    | Mackin            |                              | PhD              | University of California                            | San Francisco, USA                       | PI ADNI Depression; Executive Committee                 |                                                                                            |
| Erin                                     | Drake             |                              | MA               | Brigham and Women's Hospital/Harvard Medical School |                                          | Data and Publications Committee                         |                                                                                            |
| Craig                                    | Nelson            |                              | MD               | University of California                            | San Francisco, USA                       | Psychiatry Site Leaders/Key Personnel                   |                                                                                            |
| David                                    | Bikford           |                              | BA               | University of California                            | San Francisco, USA                       | Psychiatry Site Leaders/Key Personnel                   |                                                                                            |
| Meryl                                    | Butters           |                              | PhD              | University of Pittsburgh                            |                                          | Psychiatry Site Leaders/Key Personnel                   |                                                                                            |
| Michelle                                 | Zmuda             |                              | MA               | University of Pittsburgh                            |                                          | Psychiatry Site Leaders/Key Personnel                   |                                                                                            |
| Denise                                   | Reyes             |                              | BS               | Mayo Clinic                                         | Rochester, USA                           | MRI Core Leaders/Key Personnel                          |                                                                                            |
| Yiu                                      | Ho Au             |                              | BA               | University of California                            | San Francisco, USA                       | Site Investigator                                       |                                                                                            |
| Kelly                                    | Scherer           |                              | BS               | University of California                            | San Francisco, USA                       | Site Investigator                                       |                                                                                            |
| Daniel                                   | Catalinotto       |                              | BA               | University of California                            | San Francisco, USA                       | Site Investigator                                       |                                                                                            |
| Samuel                                   | Stark             |                              | BA               | University of California                            | San Francisco, USA                       | Site Investigator                                       |                                                                                            |

**Supplement 2. Nonauthor Collaborators**

\*First name, last name, and suffix (if applicable) are required and will appear in PubMed.

| <b>*First Name and Middle Initial(s)</b> | <b>*Last Name</b> | <b>*Suffix (eg, Jr, III)</b> | Academic Degrees | Institution              | Location (city, state/province, country) | Role or Contribution, eg, chair, principal investigator | Group (if more than 1 Group listed in the byline) and/or Subgroup (eg, Steering Committee) |
|------------------------------------------|-------------------|------------------------------|------------------|--------------------------|------------------------------------------|---------------------------------------------------------|--------------------------------------------------------------------------------------------|
| Elise                                    | Ong               |                              | BA               | University of California | San Francisco, USA                       | Site Investigator                                       |                                                                                            |
| Dariella                                 | Fernandez         |                              | BA               | University of California | San Francisco, USA                       | Site Investigator                                       |                                                                                            |
| Oscar L.                                 | Lopez             |                              | MD               | University of Pittsburgh |                                          | Site Investigator                                       |                                                                                            |
| MaryAnn                                  | Oakley            |                              | MA               | University of Pittsburgh |                                          | Site Investigator                                       |                                                                                            |
| Donna M.                                 | Simpson           |                              | CRNP,<br>MPH     | University of Pittsburgh |                                          | Site Investigator                                       |                                                                                            |
