# Supplementary material
Source: PubMed Central journal article supplement (PMC10209823)
Supplement: jamapsychiatry-e231012-s003.pdf [file jamapsychiatry-e231012-s003.pdf]

## Data Sharing Statement

McLachlan. Association Between False Memories and Delusions in Alzheimer Disease. *JAMA Psychiatry*. Published May 24, 2023. doi:10.1001/jamapsychiatry.2023.1012

### Data

**Data available:** Yes

**Data types:** Deidentified participant data

**How to access data:** Data available via ADNI: <https://adni.loni.usc.edu/data-samples/access-data/>

**When available:** beginning date: 03-26-2020

### Supporting Documents

**Document types:** None

### Additional Information

**Who can access the data:** N/A

**Types of analyses:** N/A

**Mechanisms of data availability:** N/A
